# Supplementary material for: Preclinical studies on metal based anticancer drugs as enabled by integrated metallomics and metabolomics
Source: Royal Society of Chemistry journal article supplement (doi:10.1039/c9mt00141g), 2019-08-29
Supplement: c9mt00141g1.pdf [file c9mt00141g1.pdf]

## Preclinical studies on metal based anticancer drugs as enabled by integrated metallomics and metabolomics

Luis Galvez<sup>a</sup> • Mate Ruzs<sup>b</sup> • Michaela Schwaiger-Haber<sup>a,c,d</sup> • Yasin El Abiead<sup>a,c,d</sup> • Gerrit Hermann<sup>a,e</sup> • Ute Jungwirth<sup>f</sup> • Walter Berger<sup>g,h</sup> • Bernhard K. Keppler<sup>b,g</sup> • Michael A. Jakupec<sup>b,g,h</sup> • Gunda Koellensperger<sup>a,c,d</sup>

<sup>a</sup>Institute of Analytical Chemistry, Faculty of Chemistry, University of Vienna, Waehringer Strasse 38, 1090 Vienna (Austria).

<sup>b</sup>Institute of Inorganic Chemistry, Faculty of Chemistry, University of Vienna, Althanstrasse 14 (UZA II), 1090 Vienna (Austria).

<sup>c</sup>Vienna Metabolomics Center (VIME), University of Vienna, Althanstrasse 14, 1090 Vienna (Austria).

<sup>d</sup>Research Network “Chemistry Meets Microbiology”, Althanstrasse 14, 1090 Vienna (Austria).

<sup>e</sup>ISOtopic solutions, Waehringer Strasse 38, 1090 Vienna (Austria).

<sup>f</sup>Department of Pharmacy & Pharmacology, Centre for Therapeutic Innovation, University of Bath, Claverton Down, BA2 7AY, Bath (UK).

<sup>g</sup>Medical University of Vienna, Department of Medicine I, Institute of Cancer Research, Vienna (Austria).

<sup>h</sup>Research Cluster “Translational Cancer Therapy Research”, University of Vienna and Medical University of Vienna, Vienna (Austria).

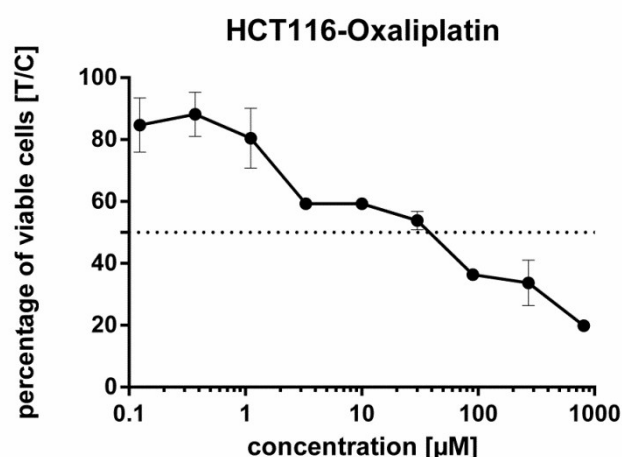

**Figure S1** Concentration–effect curves for oxaliplatin in the colorectal cancer line HCT116. An average  $IC_{50}$  value of  $35 \pm 6 \mu M$  ensured that a concentration of  $5 \mu M$  oxaliplatin was adequate (sub-cytotoxic) for the following preparations.

**Table S1** Chromatographic conditions and ICP-MS operation parameters for the quantification of the platinum uptake with FI-ICP-MS.

|                                                            |                   |
|------------------------------------------------------------|-------------------|
| Agilent 1260 Infinity Bio-inert chromatographic conditions |                   |
| Eluent                                                     | H <sub>2</sub> O  |
| Flow rate                                                  | 400 µL/min        |
| Injection volume                                           | 10 µL             |
| Autosampler temperature                                    | 2°C               |
| ICP-MS operation parameters                                |                   |
| Nebulizer                                                  | MicroMist         |
| Spray chamber                                              | Scott double-pass |
| Nebulizer gas flow                                         | 1.05 L/min        |
| Plasma gas                                                 | 15 L/min          |
| ICP RF Power                                               | 1550 W            |
| m/z measured                                               | 195               |

**Table S2** Parameters of the full mass scan (Full-MS), ESI-source (ESI) and untargeted approach (ddMS2) for the metabolomic studies with HILIC-HR-MS.

|                                     |                            |
|-------------------------------------|----------------------------|
| ESI                                 |                            |
| Sheath gas                          | 38                         |
| Auxiliary gas                       | 3                          |
| Sweep gas                           | 0                          |
| Spray voltage                       | 3.5 kV (pos), 2.8 kV (neg) |
| Capillary temperature               | 280°C                      |
| S-Lens RF                           | 30                         |
| Auxiliary gas heater                | 320°C                      |
| Full-MS                             |                            |
| Scan                                | 70-1000 m/z                |
| Polarity                            | Positive and Negative      |
| Resolution                          | 60000                      |
| Automatic Gain Control (AGC) target | 1x10 <sup>6</sup>          |
| Maximum Injection Time (IT)         | 200 ms                     |
| ddMS2                               |                            |
| TopN                                | 5                          |
| Polarity                            | Positive and Negative      |
| AGC target                          | 1x10 <sup>5</sup>          |
| IT                                  | 50 ms                      |
| Isolation                           | 1 m/z                      |
| Fragmentation with HCD energy       | NCE 30                     |
| Resolution                          | 30000                      |

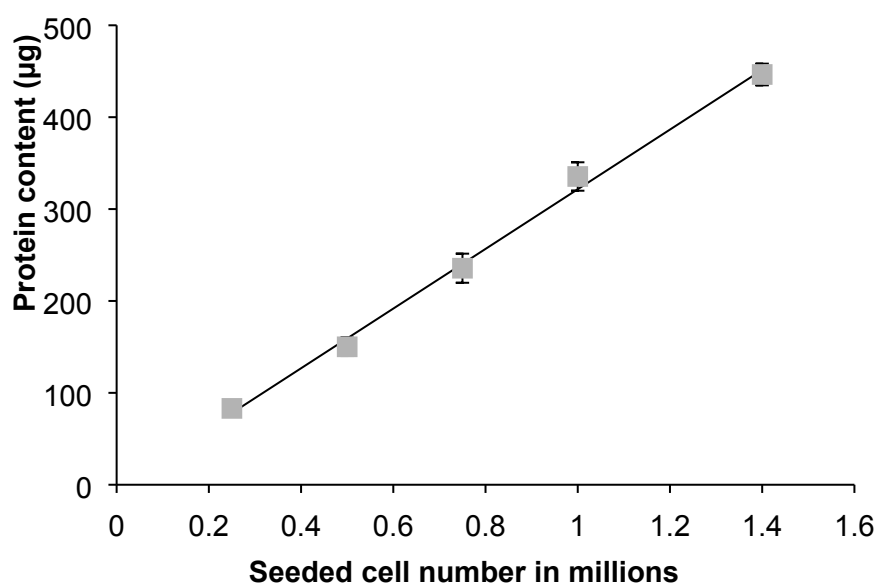

**Figure S2** Protein content of different numbers of seeded cells (melanoma cell line FTSLA) after 24 h of incubation (N=3 biological replicates) measured with the 2D-Quant Kit.

**Table S3** Analytical figures of merit for the protein content determination with the micro BCA protein kit.

| Sensitivity (µg/mL) | Linear working range (µg/mL) | Biological Repeatability (%) | Instrumental Repeatability (%) |
|---------------------|------------------------------|------------------------------|--------------------------------|
| 0.5                 | 0.5 - 20                     | < 11 (N=6)                   | < 7 (N=3)                      |



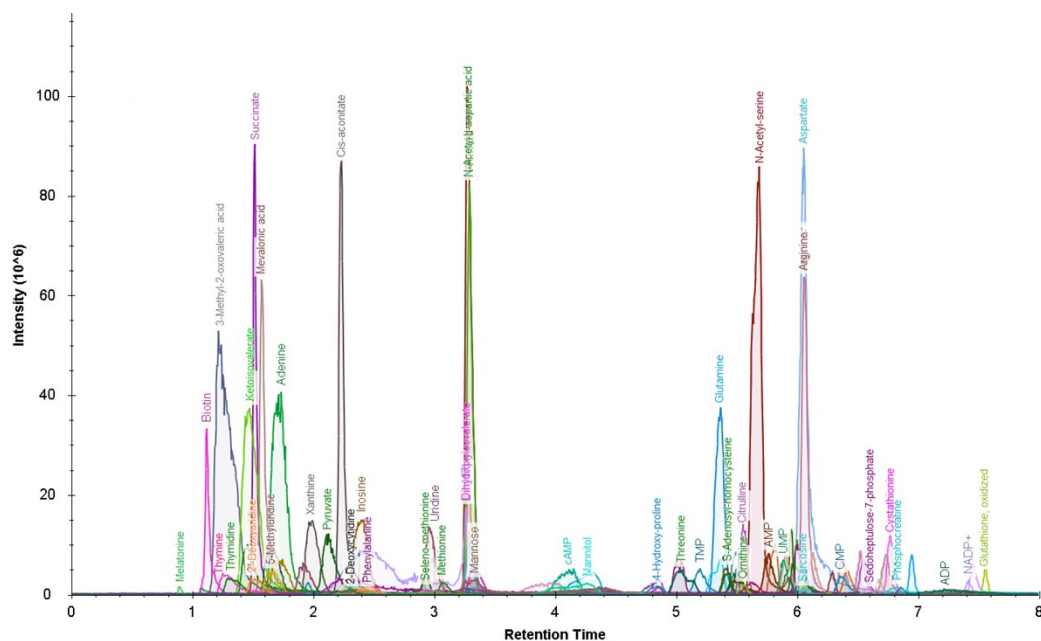

**Figure S5** Chromatogram of a 10 µM multicomponent standard measured on the UPLC BEH Amide column at pH 4 in negative mode.

**Table S4** Chromatographic conditions and gradients for the HILIC analysis of a 10 µM multicomponent standard.

| Chromatographic conditions                 |          |          |                                                                                     |          |          |                                               |          |          |
|--------------------------------------------|----------|----------|-------------------------------------------------------------------------------------|----------|----------|-----------------------------------------------|----------|----------|
| Eluent*                                    |          |          | A 50 mM HCOONH <sub>4</sub> , pH 4<br>B 80% ACN 50 mM<br>HCOONH <sub>4</sub> , pH 4 |          |          |                                               |          |          |
| Flow rate                                  |          |          | 250 µL/min                                                                          |          |          |                                               |          |          |
| Injection volume                           |          |          | 5 µL                                                                                |          |          |                                               |          |          |
| Column temperature**                       |          |          | 30°C                                                                                |          |          |                                               |          |          |
| Autosampler temperature                    |          |          | 6°C                                                                                 |          |          |                                               |          |          |
| Chromatographic gradient                   |          |          |                                                                                     |          |          |                                               |          |          |
| Acclaim Trinity P2***,<br>2.1x100 mm, 3 µm |          |          | Acclaim Trinity P1***,<br>2.1x150 mm, 3 µm                                          |          |          | Acquity UPLC BEH Amide,<br>2.1x100 mm, 1.7 µm |          |          |
| Time<br>(min)                              | A<br>(%) | B<br>(%) | Time<br>(min)                                                                       | A<br>(%) | B<br>(%) | Time<br>(min)                                 | A<br>(%) | B<br>(%) |
| 0                                          | 0        | 100      | 0                                                                                   | 0        | 100      | 0                                             | 0        | 100      |
| 2                                          | 0        | 100      | 2                                                                                   | 0        | 100      | 2                                             | 0        | 100      |
| 8                                          | 100      | 0        | 13                                                                                  | 100      | 0        | 8                                             | 50       | 50       |
| 10                                         | 100      | 0        | 15                                                                                  | 100      | 0        | 10                                            | 50       | 50       |
| 10                                         | 0        | 100      | 15                                                                                  | 0        | 100      | 10                                            | 0        | 100      |
| 15                                         | 0        | 100      | 20                                                                                  | 0        | 100      | 15                                            | 0        | 100      |

\*50 mM CH<sub>3</sub>COONH<sub>4</sub> for pH6.

\*\*40°C for the column Acquity UPLC BEH Amide.

\*\*\*The mixed mode columns Trinity P1 and Trinity P2 required 1 h pre-equilibration prior to the analysis.

**Table S5** Multicomponent standard 10  $\mu$ M in positive mode and retention times measured on the UPLC BEH Amide column at pH 4. The uniformly  $^{13}\text{C}$  labeled metabolites present in the samples were used for internal standardization.

| Positive                        |            |                                                          |                    |                                                               |                         |
|---------------------------------|------------|----------------------------------------------------------|--------------------|---------------------------------------------------------------|-------------------------|
| Compound                        | RT [min]   | $^{12}\text{C}$ metabolite                               |                    | $^{13}\text{C}$ labeled internal standard                     |                         |
|                                 |            | Formula                                                  | [M+H] <sup>+</sup> | ISTD formula                                                  | ISTD [M+H] <sup>+</sup> |
| melatonin                       | 0.88       | $\text{C}_{13}\text{H}_{16}\text{N}_2\text{O}_2$         | 233.1285           |                                                               |                         |
| 5'-Deoxy-5'-Methylthioadenosine | 1.08       | $\text{C}_{11}\text{H}_{15}\text{N}_5\text{O}_3\text{S}$ | 298.0968           | $^{13}\text{C}_{11}\text{H}_{15}\text{N}_5\text{O}_3\text{S}$ | 309.1337                |
| Biotin                          | 1.13       | $\text{C}_{10}\text{H}_{16}\text{N}_2\text{O}_3\text{S}$ | 245.0954           |                                                               |                         |
| thymidine                       | 1.3        | $\text{C}_{10}\text{H}_{14}\text{N}_2\text{O}_5$         | 243.0976           |                                                               |                         |
| 2'-Deoxyuridine                 | 1.47       | $\text{C}_9\text{H}_{12}\text{N}_2\text{O}_5$            | 229.0819           |                                                               |                         |
| Uracil                          | 1.48       | $\text{C}_4\text{H}_4\text{N}_2\text{O}_2$               | 113.0346           |                                                               |                         |
| Mevalonic acid                  | 1.55       | $\text{C}_6\text{H}_{12}\text{O}_4$                      | 149.0808           |                                                               |                         |
| serotonine                      | 1.58       | $\text{C}_{10}\text{H}_{12}\text{N}_2\text{O}$           | 177.1022           |                                                               |                         |
| 5-methyluridine                 | 1.59       | $\text{C}_{10}\text{H}_{14}\text{N}_2\text{O}_6$         | 259.0925           |                                                               |                         |
| Adenine                         | 1.69       | $\text{C}_5\text{H}_5\text{N}_5$                         | 136.0618           | $^{13}\text{C}_5\text{H}_5\text{N}_5$                         | 141.0785                |
| N4-acetylcytidine               | 1.71       | $\text{C}_{11}\text{H}_{15}\text{N}_3\text{O}_6$         | 286.1034           |                                                               |                         |
| Adenosine                       | 1.81       | $\text{C}_{10}\text{H}_{13}\text{N}_5\text{O}_4$         | 268.104            | $^{13}\text{C}_{10}\text{H}_{13}\text{N}_5\text{O}_4$         | 278.1376                |
| propionyl-L-carnitine           | 1.94       | $\text{C}_{10}\text{H}_{19}\text{NO}_4$                  | 218.1387           |                                                               |                         |
| Octopamine                      | 1.97       | $\text{C}_8\text{H}_{11}\text{NO}_2$                     | 154.0863           |                                                               |                         |
| Choline chloride                | 2.05       | $\text{C}_5\text{H}_{13}\text{NO}$                       | 104.107            | $^{13}\text{C}_5\text{H}_{13}\text{NO}$                       | 109.1238                |
| 2-deoxycytidine                 | 2.21       | $\text{C}_9\text{H}_{13}\text{N}_3\text{O}_4$            | 228.0979           |                                                               |                         |
| Tryptophan                      | 2.22       | $\text{C}_{11}\text{H}_{12}\text{N}_2\text{O}_2$         | 205.0972           | $^{13}\text{C}_{11}\text{H}_{12}\text{N}_2\text{O}_2$         | 216.1341                |
| cytosine                        | 2.23       | $\text{C}_4\text{H}_5\text{N}_3\text{O}$                 | 112.0505           |                                                               |                         |
| Phenylalanine                   | 2.29       | $\text{C}_9\text{H}_{11}\text{NO}_2$                     | 166.0863           | $^{13}\text{C}_9\text{H}_{11}\text{NO}_2$                     | 175.1164                |
| Inosine                         | 2.32       | $\text{C}_{10}\text{H}_{12}\text{N}_4\text{O}_5$         | 269.088            | $^{13}\text{C}_{10}\text{H}_{12}\text{N}_4\text{O}_5$         | 279.1216                |
| Kynurenine                      | 2.32       | $\text{C}_{10}\text{H}_{12}\text{N}_2\text{O}_3$         | 209.0921           | $^{13}\text{C}_{10}\text{H}_{12}\text{N}_2\text{O}_3$         | 219.1256                |
| Guanine                         | 2.34       | $\text{C}_5\text{H}_5\text{N}_5\text{O}$                 | 152.0567           | $^{13}\text{C}_5\text{H}_5\text{N}_5\text{O}$                 | 157.0735                |
| 1-Methylnicotinamide            | 2.39       | $\text{C}_7\text{H}_8\text{N}_2\text{O}$                 | 137.0709           | $^{13}\text{C}_7\text{H}_8\text{N}_2\text{O}$                 | 144.0944                |
| 3-methylcytidine                | 2.71       | $\text{C}_{10}\text{H}_{15}\text{N}_3\text{O}_5$         | 258.1085           |                                                               |                         |
| Pseudouridine                   | 1.90/2.85* | $\text{C}_9\text{H}_{12}\text{N}_2\text{O}_6$            | 245.0768           |                                                               |                         |
| Cytidine                        | 2.84       | $\text{C}_9\text{H}_{13}\text{N}_3\text{O}_5$            | 244.0928           | $^{13}\text{C}_9\text{H}_{13}\text{N}_3\text{O}_5$            | 253.123                 |
| Uridine                         | 1.90/2.85* | $\text{C}_9\text{H}_{12}\text{N}_2\text{O}_6$            | 245.0768           |                                                               |                         |
| seleno-methionine               | 2.86       | $\text{C}_5\text{H}_{11}\text{NO}_2\text{Se}$            | 198.0028           |                                                               |                         |
| Methionine                      | 2.89       | $\text{C}_5\text{H}_{11}\text{NO}_2\text{S}$             | 150.0583           | $^{13}\text{C}_5\text{H}_{11}\text{NO}_2\text{S}$             | 155.0751                |
| Guanosine                       | 2.91/3.79* | $\text{C}_{10}\text{H}_{13}\text{N}_5\text{O}_5$         | 284.0989           | $^{13}\text{C}_{10}\text{H}_{13}\text{N}_5\text{O}_5$         | 294.1325                |
| Isoguanosine                    | 2.91/3.79* | $\text{C}_{10}\text{H}_{13}\text{N}_5\text{O}_5$         | 284.0989           | $^{13}\text{C}_{10}\text{H}_{13}\text{N}_5\text{O}_5$         | 294.1325                |
| Homocysteine                    | 3.14       | $\text{C}_4\text{H}_9\text{NO}_2\text{S}$                | 136.0427           |                                                               |                         |
| N-acetyl-L-aspartic acid        | 3.15       | $\text{C}_6\text{H}_9\text{NO}_5$                        | 176.0554           |                                                               |                         |
| Tyrosine                        | 3.15       | $\text{C}_9\text{H}_{11}\text{NO}_3$                     | 182.0812           | $^{13}\text{C}_9\text{H}_{11}\text{NO}_3$                     | 191.1114                |
| Carnitine                       | 3.2        | $\text{C}_7\text{H}_{15}\text{NO}_3$                     | 162.1125           | $^{13}\text{C}_7\text{H}_{15}\text{NO}_3$                     | 169.136                 |

|                                    |      |                                                                               |          |                                                                                             |          |
|------------------------------------|------|-------------------------------------------------------------------------------|----------|---------------------------------------------------------------------------------------------|----------|
| 2-(carbamoylamino)butanedioic acid | 3.25 | C <sub>5</sub> H <sub>8</sub> N <sub>2</sub> O <sub>5</sub>                   | 177.0506 |                                                                                             |          |
| cAMP                               | 3.83 | C <sub>10</sub> H <sub>12</sub> N <sub>5</sub> O <sub>6</sub> P               | 330.0598 |                                                                                             |          |
| Mannitol                           | 3.99 | C <sub>6</sub> H <sub>14</sub> O <sub>6</sub>                                 | 183.0863 |                                                                                             |          |
| methionine sulfone                 | 4.11 | C <sub>5</sub> H <sub>11</sub> NO <sub>4</sub> S                              | 182.0482 |                                                                                             |          |
| sarcosine                          | 4.66 | C <sub>3</sub> H <sub>7</sub> NO <sub>2</sub>                                 | 90.055   | <sup>13</sup> C <sub>3</sub> H <sub>7</sub> NO <sub>2</sub>                                 | 93.065   |
| Alanine                            | 4.70 | C <sub>3</sub> H <sub>7</sub> NO <sub>2</sub>                                 | 90.055   | <sup>13</sup> C <sub>3</sub> H <sub>7</sub> NO <sub>2</sub>                                 | 93.065   |
| cGMP                               | 4.80 | C <sub>10</sub> H <sub>12</sub> N <sub>5</sub> O <sub>7</sub> P               | 346.0547 | <sup>13</sup> C <sub>10</sub> H <sub>12</sub> N <sub>5</sub> O <sub>7</sub> P               | 356.0883 |
| Threonine                          | 5.00 | C <sub>4</sub> H <sub>9</sub> NO <sub>3</sub>                                 | 120.0655 | <sup>13</sup> C <sub>4</sub> H <sub>9</sub> NO <sub>3</sub>                                 | 122.0789 |
| Homoserine                         | 5.00 | C <sub>4</sub> H <sub>9</sub> NO <sub>3</sub>                                 | 120.0655 | <sup>13</sup> C <sub>4</sub> H <sub>9</sub> NO <sub>3</sub>                                 | 122.0789 |
| Glycine                            | 5.01 | C <sub>2</sub> H <sub>5</sub> NO <sub>2</sub>                                 | 76.0393  | <sup>13</sup> C <sub>2</sub> H <sub>5</sub> NO <sub>2</sub>                                 | 78.046   |
| TMP                                | 5.10 | C <sub>10</sub> H <sub>15</sub> N <sub>2</sub> O <sub>8</sub> P               | 323.0639 |                                                                                             |          |
| alpha-aminoadipic acid             | 5.20 | C <sub>6</sub> H <sub>11</sub> NO <sub>4</sub>                                | 162.0761 | <sup>13</sup> C <sub>6</sub> H <sub>11</sub> NO <sub>4</sub>                                | 168.0962 |
| Glutamine                          | 5.22 | C <sub>5</sub> H <sub>10</sub> N <sub>2</sub> O <sub>3</sub>                  | 147.0764 | <sup>13</sup> C <sub>5</sub> H <sub>10</sub> N <sub>2</sub> O <sub>3</sub>                  | 152.0932 |
| S-Adenosyl-homocysteine            | 5.30 | C <sub>14</sub> H <sub>20</sub> N <sub>6</sub> O <sub>5</sub> S               | 385.1289 |                                                                                             |          |
| Serine                             | 5.30 | C <sub>3</sub> H <sub>7</sub> NO <sub>3</sub>                                 | 106.0499 | <sup>13</sup> C <sub>3</sub> H <sub>7</sub> NO <sub>3</sub>                                 | 109.0599 |
| dAMP                               | 5.34 | C <sub>10</sub> H <sub>14</sub> N <sub>5</sub> O <sub>6</sub> P               | 332.0755 |                                                                                             |          |
| Asparagine                         | 5.42 | C <sub>4</sub> H <sub>8</sub> N <sub>2</sub> O <sub>3</sub>                   | 133.0608 | <sup>13</sup> C <sub>4</sub> H <sub>8</sub> N <sub>2</sub> O <sub>3</sub>                   | 137.0742 |
| Dihydroxyacetonephosphate          | 5.43 | C <sub>3</sub> H <sub>7</sub> O <sub>6</sub> P                                | 171.0053 |                                                                                             |          |
| Citrulline                         | 5.45 | C <sub>6</sub> H <sub>13</sub> N <sub>3</sub> O <sub>3</sub>                  | 176.103  | <sup>13</sup> C <sub>6</sub> H <sub>13</sub> N <sub>3</sub> O <sub>3</sub>                  | 182.1231 |
| Ornithine                          | 5.53 | C <sub>5</sub> H <sub>12</sub> N <sub>2</sub> O <sub>2</sub>                  | 133.0972 | <sup>13</sup> C <sub>5</sub> H <sub>12</sub> N <sub>2</sub> O <sub>2</sub>                  | 138.1139 |
| Glutamate                          | 5.56 | C <sub>5</sub> H <sub>9</sub> NO <sub>4</sub>                                 | 148.0604 | <sup>13</sup> C <sub>5</sub> H <sub>9</sub> NO <sub>4</sub>                                 | 153.0772 |
| 5AMP                               | 5.62 | C <sub>10</sub> H <sub>14</sub> N <sub>5</sub> O <sub>7</sub> P               | 348.0704 | <sup>13</sup> C <sub>10</sub> H <sub>14</sub> N <sub>5</sub> O <sub>7</sub> P               | 358.1039 |
| 3AMP                               | 5.62 | C <sub>10</sub> H <sub>14</sub> N <sub>5</sub> O <sub>7</sub> P               | 348.0704 | <sup>13</sup> C <sub>10</sub> H <sub>14</sub> N <sub>5</sub> O <sub>7</sub> P               | 358.1039 |
| Cysteic acid                       | 5.73 | C <sub>3</sub> H <sub>7</sub> NO <sub>5</sub> S                               | 170.0178 |                                                                                             |          |
| UMP                                | 5.80 | C <sub>9</sub> H <sub>13</sub> N <sub>2</sub> O <sub>9</sub> P                | 325.0431 | <sup>13</sup> C <sub>9</sub> H <sub>13</sub> N <sub>2</sub> O <sub>9</sub> P                | 334.0733 |
| Ribose-5-phosphate                 | 5.81 | C <sub>5</sub> H <sub>11</sub> O <sub>8</sub> P                               | 231.0264 | <sup>13</sup> C <sub>5</sub> H <sub>11</sub> O <sub>8</sub> P                               | 236.0432 |
| Ribulose-5-phosphate               | 5.81 | C <sub>5</sub> H <sub>11</sub> O <sub>8</sub> P                               | 231.0264 | <sup>13</sup> C <sub>5</sub> H <sub>11</sub> O <sub>8</sub> P                               | 236.0432 |
| Cysteinyl-glycine                  | 5.84 | C <sub>5</sub> H <sub>10</sub> N <sub>2</sub> O <sub>3</sub> S                | 179.0485 |                                                                                             |          |
| Glutamyl-cysteine                  | 5.85 | C <sub>8</sub> H <sub>14</sub> N <sub>2</sub> O <sub>5</sub> S                | 251.0696 |                                                                                             |          |
| Histidine                          | 5.86 | C <sub>6</sub> H <sub>9</sub> N <sub>3</sub> O <sub>2</sub>                   | 156.0768 | <sup>13</sup> C <sub>6</sub> H <sub>9</sub> N <sub>3</sub> O <sub>2</sub>                   | 162.0969 |
| Glutathione reduced                | 5.87 | C <sub>10</sub> H <sub>17</sub> N <sub>3</sub> O <sub>6</sub> S               | 308.0911 | <sup>13</sup> C <sub>10</sub> H <sub>17</sub> N <sub>3</sub> O <sub>6</sub> S               | 318.1246 |
| Aspartic acid                      | 5.90 | C <sub>4</sub> H <sub>7</sub> NO <sub>4</sub>                                 | 134.0448 | <sup>13</sup> C <sub>4</sub> H <sub>7</sub> NO <sub>4</sub>                                 | 138.0582 |
| dCMP                               | 5.90 | C <sub>9</sub> H <sub>14</sub> N <sub>3</sub> O <sub>7</sub> P                | 308.0642 |                                                                                             |          |
| IMP                                | 5.92 | C <sub>10</sub> H <sub>13</sub> N <sub>4</sub> O <sub>8</sub> P               | 349.0544 | <sup>13</sup> C <sub>10</sub> H <sub>13</sub> N <sub>4</sub> O <sub>8</sub> P               | 359.0879 |
| Arginine                           | 5.94 | C <sub>6</sub> H <sub>14</sub> N <sub>4</sub> O <sub>2</sub>                  | 175.119  | <sup>13</sup> C <sub>6</sub> H <sub>14</sub> N <sub>4</sub> O <sub>2</sub>                  | 181.1391 |
| erythrose-4-phosphate              | 6.02 | C <sub>4</sub> H <sub>9</sub> O <sub>7</sub> P                                | 201.0159 |                                                                                             |          |
| Lysine                             | 6.10 | C <sub>6</sub> H <sub>14</sub> N <sub>2</sub> O <sub>2</sub>                  | 147.1128 | <sup>13</sup> C <sub>6</sub> H <sub>14</sub> N <sub>2</sub> O <sub>2</sub>                  | 153.1329 |
| Flavinadenin dinucleotide          | 6.14 | C <sub>27</sub> H <sub>33</sub> N <sub>9</sub> O <sub>15</sub> P <sub>2</sub> | 786.1644 | <sup>13</sup> C <sub>27</sub> H <sub>33</sub> N <sub>9</sub> O <sub>15</sub> P <sub>2</sub> | 813.255  |
| CMP                                | 6.24 | C <sub>9</sub> H <sub>14</sub> N <sub>3</sub> O <sub>8</sub> P                | 324.0591 | <sup>13</sup> C <sub>9</sub> H <sub>14</sub> N <sub>3</sub> O <sub>8</sub> P                | 333.0893 |
| GMP                                | 6.30 | C <sub>10</sub> H <sub>14</sub> N <sub>5</sub> O <sub>8</sub> P               | 364.0653 | <sup>13</sup> C <sub>10</sub> H <sub>14</sub> N <sub>5</sub> O <sub>8</sub> P               | 374.0988 |
| NADH                               | 6.31 | C <sub>21</sub> H <sub>29</sub> N <sub>7</sub> O <sub>14</sub> P <sub>2</sub> | 666.1321 | <sup>13</sup> C <sub>21</sub> H <sub>29</sub> N <sub>7</sub> O <sub>14</sub> P <sub>2</sub> | 687.2025 |
| S-(adenosyl)-methionine            | 6.35 | C <sub>15</sub> H <sub>22</sub> N <sub>6</sub> O <sub>5</sub> S               | 399.1445 |                                                                                             |          |
| Fructose-6-Phosphate               | 6.42 | C <sub>6</sub> H <sub>13</sub> O <sub>9</sub> P                               | 261.037  | <sup>13</sup> C <sub>6</sub> H <sub>13</sub> O <sub>9</sub> P                               | 267.0571 |
| Glucose-6-Phosphate                | 6.42 | C <sub>6</sub> H <sub>13</sub> O <sub>9</sub> P                               | 261.037  | <sup>13</sup> C <sub>6</sub> H <sub>13</sub> O <sub>9</sub> P                               | 267.0571 |
| Glucose-1-Phosphate                | 6.42 | C <sub>6</sub> H <sub>13</sub> O <sub>9</sub> P                               | 261.037  | <sup>13</sup> C <sub>6</sub> H <sub>13</sub> O <sub>9</sub> P                               | 267.0571 |
| Mannitol-1-phosphate               | 6.44 | C <sub>6</sub> H <sub>15</sub> O <sub>9</sub> P                               | 263.0526 |                                                                                             |          |
| spermidine                         | 6.50 | C <sub>7</sub> H <sub>19</sub> N <sub>3</sub>                                 | 146.1652 |                                                                                             |          |
| Sedoheptulose-7-phosphate          | 6.50 | C <sub>7</sub> H <sub>15</sub> O <sub>10</sub> P                              | 291.0476 |                                                                                             |          |

|                           |      |                                                                               |          |                                                                                             |          |
|---------------------------|------|-------------------------------------------------------------------------------|----------|---------------------------------------------------------------------------------------------|----------|
| NAD+                      | 6.55 | C <sub>21</sub> H <sub>27</sub> N <sub>7</sub> O <sub>14</sub> P <sub>2</sub> | 663.1091 | <sup>13</sup> C <sub>21</sub> H <sub>27</sub> N <sub>7</sub> O <sub>14</sub> P <sub>2</sub> | 684.1796 |
| Cystathionine             | 6.64 | C <sub>7</sub> H <sub>14</sub> N <sub>2</sub> O <sub>4</sub> S                | 223.0747 | <sup>13</sup> C <sub>7</sub> H <sub>14</sub> N <sub>2</sub> O <sub>4</sub> S                | 230.0982 |
| Cystine                   | 6.70 | C <sub>6</sub> H <sub>12</sub> N <sub>2</sub> O <sub>4</sub> S <sub>2</sub>   | 241.0311 |                                                                                             |          |
| phosphocreatine           | 6.75 | C <sub>4</sub> H <sub>10</sub> N <sub>3</sub> O <sub>5</sub> P                | 212.0431 |                                                                                             |          |
| Argininosuccinic acid     | 6.81 | C <sub>10</sub> H <sub>18</sub> N <sub>4</sub> O <sub>6</sub>                 | 291.1299 | <sup>13</sup> C <sub>10</sub> H <sub>18</sub> N <sub>4</sub> O <sub>6</sub>                 | 301.1635 |
| ADP                       | 7.08 | C <sub>10</sub> H <sub>15</sub> N <sub>5</sub> O <sub>10</sub> P <sub>2</sub> | 428.0367 | <sup>13</sup> C <sub>10</sub> H <sub>15</sub> N <sub>5</sub> O <sub>10</sub> P <sub>2</sub> | 438.0702 |
| UDP                       | 7.12 | C <sub>9</sub> H <sub>14</sub> N <sub>2</sub> O <sub>12</sub> P <sub>2</sub>  | 405.0095 |                                                                                             |          |
| NADPH                     | 7.15 | C <sub>21</sub> H <sub>30</sub> N <sub>7</sub> O <sub>17</sub> P <sub>3</sub> | 746.0984 | <sup>13</sup> C <sub>21</sub> H <sub>30</sub> N <sub>7</sub> O <sub>17</sub> P <sub>3</sub> | 767.1688 |
| spermine                  | 7.15 | C <sub>10</sub> H <sub>26</sub> N <sub>4</sub>                                | 203.223  |                                                                                             |          |
| NADP+                     | 7.31 | C <sub>21</sub> H <sub>29</sub> N <sub>7</sub> O <sub>17</sub> P <sub>3</sub> | 744.0833 | <sup>13</sup> C <sub>21</sub> H <sub>29</sub> N <sub>7</sub> O <sub>17</sub> P <sub>3</sub> | 765.1537 |
| Fructose-1,6-bisphosphate | 7.36 | C <sub>6</sub> H <sub>14</sub> O <sub>12</sub> P                              | 341.0033 | <sup>13</sup> C <sub>6</sub> H <sub>14</sub> O <sub>12</sub> P                              | 347.0235 |
| GDP                       | 7.42 | C <sub>10</sub> H <sub>15</sub> N <sub>5</sub> O <sub>11</sub> P <sub>2</sub> | 444.0316 | <sup>13</sup> C <sub>10</sub> H <sub>15</sub> N <sub>5</sub> O <sub>11</sub> P <sub>2</sub> | 454.0652 |
| Glutathione oxidized      | 7.50 | C <sub>20</sub> H <sub>32</sub> N <sub>6</sub> O <sub>12</sub> S <sub>2</sub> | 613.1592 | <sup>13</sup> C <sub>20</sub> H <sub>32</sub> N <sub>6</sub> O <sub>12</sub> S <sub>2</sub> | 633.2263 |
| 3-Phosphoglycerate        | 7.64 | C <sub>3</sub> H <sub>7</sub> O <sub>7</sub> P                                | 187.0002 | <sup>13</sup> C <sub>3</sub> H <sub>7</sub> O <sub>7</sub> P                                | 190.0103 |
| 6-Phosphogluconate        | 7.78 | C <sub>6</sub> H <sub>13</sub> O <sub>10</sub> P                              | 277.0319 | <sup>13</sup> C <sub>6</sub> H <sub>13</sub> O <sub>10</sub> P                              | 283.052  |
| TTP                       | 7.81 | C <sub>10</sub> H <sub>18</sub> N <sub>2</sub> O <sub>14</sub> P <sub>3</sub> | 482.9965 |                                                                                             |          |
| dGTP                      | 8.02 | C <sub>10</sub> H <sub>16</sub> N <sub>5</sub> O <sub>13</sub> P <sub>3</sub> | 508.003  | <sup>13</sup> C <sub>10</sub> H <sub>16</sub> N <sub>5</sub> O <sub>13</sub> P <sub>3</sub> | 518.0366 |
| dATP                      | 8.06 | C <sub>10</sub> H <sub>17</sub> N <sub>5</sub> O <sub>12</sub> P <sub>3</sub> | 492.0081 |                                                                                             |          |
| ATP                       | 8.11 | C <sub>10</sub> H <sub>16</sub> N <sub>5</sub> O <sub>13</sub> P <sub>3</sub> | 508.003  | <sup>13</sup> C <sub>10</sub> H <sub>16</sub> N <sub>5</sub> O <sub>13</sub> P <sub>3</sub> | 518.0366 |
| GTP                       | 8.14 | C <sub>10</sub> H <sub>16</sub> N <sub>5</sub> O <sub>14</sub> P <sub>3</sub> | 523.9979 |                                                                                             |          |
| UTP                       | 8.21 | C <sub>9</sub> H <sub>16</sub> N <sub>2</sub> O <sub>15</sub> P <sub>3</sub>  | 484.9758 |                                                                                             |          |
| CTP                       | 8.43 | C <sub>9</sub> H <sub>16</sub> N <sub>3</sub> O <sub>14</sub> P <sub>3</sub>  | 483.9918 |                                                                                             |          |
| dCTP                      | 8.46 | C <sub>9</sub> H <sub>17</sub> N <sub>3</sub> O <sub>13</sub> P <sub>3</sub>  | 467.9969 |                                                                                             |          |

\*Isomers which could be separated on the UPLC BEH Amide column at pH 4 in positive mode. For further identification an analysis of the single standard is necessary.

**Table S6** Multicomponent standard 10 µM in negative mode and retention times measured on the UPLC BEH Amide column at pH 4. The uniformly <sup>13</sup>C labeled metabolites present in the samples were used for internal standardization.

| Negative                        |          |                                                                 |                    |                                                             |                         |
|---------------------------------|----------|-----------------------------------------------------------------|--------------------|-------------------------------------------------------------|-------------------------|
| Compound                        | RT [min] | <sup>12</sup> C metabolite                                      |                    | <sup>13</sup> C labeled internal standard                   |                         |
|                                 |          | Formula                                                         | [M-H] <sup>-</sup> | ISTD formula                                                | ISTD [M-H] <sup>-</sup> |
| melatonin                       | 0.90     | C <sub>13</sub> H <sub>16</sub> N <sub>2</sub> O <sub>2</sub>   | 231.1139           |                                                             |                         |
| 5'-Deoxy-5'-Methylthioadenosine | 1.08     | C <sub>11</sub> H <sub>15</sub> N <sub>5</sub> O <sub>3</sub> S | 296.0823           |                                                             |                         |
| biotin                          | 1.12     | C <sub>10</sub> H <sub>16</sub> N <sub>2</sub> O <sub>3</sub> S | 243.0809           |                                                             |                         |
| 3-Methyl-2-oxovaleric acid      | 1.22     | C <sub>6</sub> H <sub>10</sub> O <sub>3</sub>                   | 129.0557           | <sup>13</sup> C <sub>6</sub> H <sub>10</sub> O <sub>3</sub> | 135.0759                |
| thymine                         | 1.26     | C <sub>5</sub> H <sub>6</sub> N <sub>2</sub> O <sub>2</sub>     | 125.0357           |                                                             |                         |
| thymidine                       | 1.32     | C <sub>10</sub> H <sub>14</sub> N <sub>2</sub> O <sub>5</sub>   | 241.0830           |                                                             |                         |
| Uracil                          | 1.45     | C <sub>4</sub> H <sub>4</sub> N <sub>2</sub> O <sub>2</sub>     | 111.0200           |                                                             |                         |
| Ketoisovalerate                 | 1.47     | C <sub>5</sub> H <sub>8</sub> O <sub>3</sub>                    | 115.0401           | <sup>13</sup> C <sub>5</sub> H <sub>8</sub> O <sub>3</sub>  | 120.0568                |
| 2'-deoxyuridine                 | 1.50     | C <sub>9</sub> H <sub>12</sub> N <sub>2</sub> O <sub>5</sub>    | 227.0673           |                                                             |                         |
| Succinate                       | 1.52     | C <sub>4</sub> H <sub>6</sub> O <sub>4</sub>                    | 117.0193           | <sup>13</sup> C <sub>4</sub> H <sub>6</sub> O <sub>4</sub>  | 121.0328                |
| Mevalonic acid                  | 1.57     | C <sub>6</sub> H <sub>12</sub> O <sub>4</sub>                   | 147.0663           | <sup>13</sup> C <sub>6</sub> H <sub>12</sub> O <sub>4</sub> | 153.0864                |
| 5-methyluridine                 | 1.65     | C <sub>10</sub> H <sub>14</sub> N <sub>2</sub> O <sub>6</sub>   | 257.0779           |                                                             |                         |
| Adenine                         | 1.72     | C <sub>5</sub> H <sub>5</sub> N <sub>5</sub>                    | 134.0472           | <sup>13</sup> C <sub>5</sub> H <sub>5</sub> N <sub>5</sub>  | 139.0640                |
| N4-acetylcytidine               | 1.75     | C <sub>11</sub> H <sub>15</sub> N <sub>3</sub> O <sub>6</sub>   | 284.0888           |                                                             |                         |



|                                    |            |                                                                 |          |                                                                               |          |
|------------------------------------|------------|-----------------------------------------------------------------|----------|-------------------------------------------------------------------------------|----------|
| Adenosine                          | 1.84       | C <sub>10</sub> H <sub>13</sub> N <sub>5</sub> O <sub>4</sub>   | 266.0895 |                                                                               |          |
| Pseudouridine                      | 1.92/2.91* | C <sub>9</sub> H <sub>12</sub> N <sub>2</sub> O <sub>6</sub>    | 243.0623 |                                                                               |          |
| Uridine                            | 1.92/2.91* | C <sub>9</sub> H <sub>12</sub> N <sub>2</sub> O <sub>6</sub>    | 243.0623 |                                                                               |          |
| Xanthine                           | 1.99       | C <sub>5</sub> H <sub>4</sub> N <sub>4</sub> O <sub>2</sub>     | 151.0262 |                                                                               |          |
| Lactate                            | 2.23       | C <sub>3</sub> H <sub>6</sub> O <sub>3</sub>                    | 89.0244  | <sup>13</sup> C <sub>3</sub> H <sub>6</sub> O <sub>3</sub>                    | 92.0345  |
| cis-Aconitate                      | 2.24       | C <sub>6</sub> H <sub>6</sub> O <sub>6</sub>                    | 173.0092 | <sup>13</sup> C <sub>6</sub> H <sub>6</sub> O <sub>6</sub>                    | 179.0293 |
| 2-deoxycytidine                    | 2.30       | C <sub>9</sub> H <sub>13</sub> N <sub>3</sub> O <sub>4</sub>    | 226.0833 |                                                                               |          |
| Tryptophan                         | 2.33       | C <sub>11</sub> H <sub>12</sub> N <sub>2</sub> O <sub>2</sub>   | 203.0826 |                                                                               |          |
| gluconate                          | 2.35       | C <sub>6</sub> H <sub>12</sub> O <sub>7</sub>                   | 195.0510 |                                                                               |          |
| Ribose                             | 2.35/3.02* | C <sub>5</sub> H <sub>10</sub> O <sub>5</sub>                   | 149.0456 |                                                                               |          |
| Xylose                             | 2.35/3.02* | C <sub>5</sub> H <sub>10</sub> O <sub>5</sub>                   | 149.0456 |                                                                               |          |
| Guanine                            | 2.39       | C <sub>5</sub> H <sub>5</sub> N <sub>5</sub> O                  | 150.0421 |                                                                               |          |
| Pyruvate                           | 2.40       | C <sub>3</sub> H <sub>4</sub> O <sub>3</sub>                    | 87.0088  | <sup>13</sup> C <sub>3</sub> H <sub>4</sub> O <sub>3</sub>                    | 90.0188  |
| Inosine                            | 2.42       | C <sub>10</sub> H <sub>12</sub> N <sub>4</sub> O <sub>5</sub>   | 267.0735 |                                                                               |          |
| Kynurenine                         | 2.43       | C <sub>10</sub> H <sub>12</sub> N <sub>2</sub> O <sub>3</sub>   | 207.0775 |                                                                               |          |
| Phenylalanine                      | 2.44       | C <sub>9</sub> H <sub>11</sub> NO <sub>2</sub>                  | 164.0717 |                                                                               |          |
| seleno-methionine                  | 2.82       | C <sub>5</sub> H <sub>11</sub> NO <sub>2</sub> Se               | 195.9882 |                                                                               |          |
| Cytidine                           | 2.90       | C <sub>9</sub> H <sub>13</sub> N <sub>3</sub> O <sub>5</sub>    | 242.0782 |                                                                               |          |
| Methionine                         | 2.94       | C <sub>5</sub> H <sub>11</sub> NO <sub>2</sub> S                | 148.0438 |                                                                               |          |
| Guanosine                          | 2.98/3.89* | C <sub>10</sub> H <sub>13</sub> N <sub>5</sub> O <sub>5</sub>   | 282.0844 |                                                                               |          |
| Isoguanosine                       | 2.98/3.89* | C <sub>10</sub> H <sub>13</sub> N <sub>5</sub> O <sub>5</sub>   | 282.0844 |                                                                               |          |
| Tyrosine                           | 3.23       | C <sub>9</sub> H <sub>11</sub> NO <sub>3</sub>                  | 180.0666 |                                                                               |          |
| Dihydroxyisovalerate               | 3.23       | C <sub>5</sub> H <sub>10</sub> O <sub>4</sub>                   | 133.0506 | <sup>13</sup> C <sub>5</sub> H <sub>10</sub> O <sub>4</sub>                   | 138.0674 |
| Fructose                           | 3.26       | C <sub>6</sub> H <sub>12</sub> O <sub>6</sub>                   | 179.0561 | <sup>13</sup> C <sub>10</sub> H <sub>13</sub> N <sub>5</sub> O <sub>4</sub>   | 185.0762 |
| Galactose                          | 3.26       | C <sub>6</sub> H <sub>12</sub> O <sub>6</sub>                   | 179.0561 | <sup>13</sup> C <sub>10</sub> H <sub>13</sub> N <sub>5</sub> O <sub>4</sub>   | 185.0762 |
| Glucose                            | 3.26       | C <sub>6</sub> H <sub>12</sub> O <sub>6</sub>                   | 179.0561 | <sup>13</sup> C <sub>10</sub> H <sub>13</sub> N <sub>5</sub> O <sub>4</sub>   | 185.0762 |
| Inositol                           | 3.26       | C <sub>6</sub> H <sub>12</sub> O <sub>6</sub>                   | 179.0561 | <sup>13</sup> C <sub>10</sub> H <sub>13</sub> N <sub>5</sub> O <sub>4</sub>   | 185.0762 |
| Mannose                            | 3.26       | C <sub>6</sub> H <sub>12</sub> O <sub>6</sub>                   | 179.0561 | <sup>13</sup> C <sub>10</sub> H <sub>13</sub> N <sub>5</sub> O <sub>4</sub>   | 185.0762 |
| N-Acetyl-serine                    | 3.26       | C <sub>5</sub> H <sub>9</sub> NO <sub>4</sub>                   | 146.0459 |                                                                               |          |
| N-acetyl-L-aspartic acid           | 3.29       | C <sub>6</sub> H <sub>9</sub> NO <sub>5</sub>                   | 174.0408 |                                                                               |          |
| alpha-Ketoglutarate                | 3.29       | C <sub>5</sub> H <sub>6</sub> O <sub>5</sub>                    | 145.0142 | <sup>13</sup> C <sub>5</sub> H <sub>6</sub> O <sub>5</sub>                    | 150.0310 |
| Fumarate                           | 3.29       | C <sub>4</sub> H <sub>4</sub> O <sub>4</sub>                    | 115.0037 | <sup>13</sup> C <sub>4</sub> H <sub>4</sub> O <sub>4</sub>                    | 119.0171 |
| Hydroxyglutaric acid               | 3.29       | C <sub>5</sub> H <sub>8</sub> O <sub>5</sub>                    | 147.0299 | <sup>13</sup> C <sub>5</sub> H <sub>8</sub> O <sub>5</sub>                    | 152.0467 |
| 2-(carbamoylamino)butanedioic acid | 3.32       | C <sub>5</sub> H <sub>8</sub> N <sub>2</sub> O <sub>5</sub>     | 175.0360 |                                                                               |          |
| cAMP                               | 4.15       | C <sub>10</sub> H <sub>12</sub> N <sub>5</sub> O <sub>6</sub> P | 328.0452 |                                                                               |          |
| Mannitol                           | 4.24       | C <sub>6</sub> H <sub>14</sub> O <sub>6</sub>                   | 181.0718 |                                                                               |          |
| methionine sulfone                 | 4.31       | C <sub>5</sub> H <sub>11</sub> NO <sub>4</sub> S                | 180.0336 |                                                                               |          |
| Alanine                            | 4.66       | C <sub>3</sub> H <sub>7</sub> NO <sub>2</sub>                   | 88.0404  |                                                                               |          |
| sarcosine                          | 4.66       | C <sub>3</sub> H <sub>7</sub> NO <sub>2</sub>                   | 88.0404  |                                                                               |          |
| guanidineacetic acid               | 4.83       | C <sub>3</sub> H <sub>7</sub> N <sub>3</sub> O <sub>2</sub>     | 116.0466 |                                                                               |          |
| Glycine                            | 4.85       | C <sub>2</sub> H <sub>5</sub> NO <sub>2</sub>                   | 74.0248  |                                                                               |          |
| cGMP                               | 5.00       | C <sub>10</sub> H <sub>12</sub> N <sub>5</sub> O <sub>7</sub> P | 344.0402 |                                                                               |          |
| Threonine                          | 5.05       | C <sub>4</sub> H <sub>9</sub> NO <sub>3</sub>                   | 118.0510 | <sup>13</sup> C <sub>4</sub> H <sub>9</sub> NO <sub>3</sub>                   | 122.0642 |
| Homoserine                         | 5.05       | C <sub>4</sub> H <sub>9</sub> NO <sub>3</sub>                   | 118.0510 | <sup>13</sup> C <sub>4</sub> H <sub>9</sub> NO <sub>3</sub>                   | 122.0642 |
| TMP                                | 5.19       | C <sub>10</sub> H <sub>15</sub> N <sub>5</sub> O <sub>8</sub> P | 321.0493 |                                                                               |          |
| alpha-aminoadipic acid             | 5.34       | C <sub>6</sub> H <sub>11</sub> NO <sub>4</sub>                  | 160.0615 | <sup>13</sup> C <sub>6</sub> H <sub>11</sub> NO <sub>4</sub>                  | 166.0817 |
| Glutamine                          | 5.36       | C <sub>5</sub> H <sub>10</sub> N <sub>2</sub> O <sub>3</sub>    | 145.0619 | <sup>13</sup> C <sub>5</sub> H <sub>10</sub> N <sub>2</sub> O <sub>3</sub>    | 150.0786 |
| S-Adenosyl-homocysteine            | 5.42       | C <sub>14</sub> H <sub>20</sub> N <sub>6</sub> O <sub>5</sub> S | 383.1143 |                                                                               |          |
| Serine                             | 5.42       | C <sub>3</sub> H <sub>7</sub> NO <sub>3</sub>                   | 104.0353 | <sup>13</sup> C <sub>3</sub> H <sub>7</sub> NO <sub>3</sub>                   | 107.0454 |
| Asparagine                         | 5.42       | C <sub>4</sub> H <sub>8</sub> N <sub>2</sub> O <sub>3</sub>     | 131.0462 | <sup>13</sup> C <sub>4</sub> H <sub>8</sub> N <sub>2</sub> O <sub>3</sub>     | 135.0596 |
| dAMP                               | 5.45       | C <sub>10</sub> H <sub>14</sub> N <sub>5</sub> O <sub>6</sub> P | 330.0609 |                                                                               |          |
| Citrulline                         | 5.49       | C <sub>6</sub> H <sub>13</sub> N <sub>3</sub> O <sub>3</sub>    | 174.0884 | <sup>13</sup> C <sub>6</sub> H <sub>13</sub> N <sub>3</sub> O <sub>3</sub>    | 180.1085 |
| Ornithine                          | 5.53       | C <sub>5</sub> H <sub>12</sub> N <sub>2</sub> O <sub>2</sub>    | 131.0826 | <sup>13</sup> C <sub>5</sub> H <sub>12</sub> N <sub>2</sub> O <sub>2</sub>    | 136.0994 |
| Dihydroxyacetonephosphate          | 5.62       | C <sub>3</sub> H <sub>7</sub> O <sub>6</sub> P                  | 168.9908 | <sup>13</sup> C <sub>3</sub> H <sub>7</sub> O <sub>6</sub> P                  | 172.0008 |
| 3AMP                               | 5.62       | C <sub>10</sub> H <sub>14</sub> N <sub>5</sub> O <sub>7</sub> P | 346.0558 | <sup>13</sup> C <sub>10</sub> H <sub>14</sub> N <sub>5</sub> O <sub>7</sub> P | 356.0894 |
| Glutamate                          | 5.64       | C <sub>5</sub> H <sub>9</sub> NO <sub>4</sub>                   | 146.0459 | <sup>13</sup> C <sub>5</sub> H <sub>9</sub> NO <sub>4</sub>                   | 151.0627 |
| 5AMP                               | 5.72       | C <sub>10</sub> H <sub>14</sub> N <sub>5</sub> O <sub>7</sub> P | 346.0558 | <sup>13</sup> C <sub>10</sub> H <sub>14</sub> N <sub>5</sub> O <sub>7</sub> P | 356.0894 |
| Cysteic acid                       | 5.78       | C <sub>3</sub> H <sub>7</sub> NO <sub>5</sub> S                 | 167.9972 | <sup>13</sup> C <sub>3</sub> H <sub>7</sub> NO <sub>5</sub> S                 | 171.0073 |
| UMP                                | 5.88       | C <sub>9</sub> H <sub>13</sub> N <sub>2</sub> O <sub>9</sub> P  | 323.0286 | <sup>13</sup> C <sub>9</sub> H <sub>13</sub> N <sub>2</sub> O <sub>9</sub> P  | 332.0588 |

|                           |      |                                                                               |          |                                                                                             |          |
|---------------------------|------|-------------------------------------------------------------------------------|----------|---------------------------------------------------------------------------------------------|----------|
| Glutamyl-cysteine         | 5.94 | C <sub>8</sub> H <sub>14</sub> N <sub>2</sub> O <sub>5</sub> S                | 249.0551 |                                                                                             |          |
| Glutathione reduced       | 5.95 | C <sub>10</sub> H <sub>17</sub> N <sub>3</sub> O <sub>6</sub> S               | 306.0765 | <sup>13</sup> C <sub>10</sub> H <sub>17</sub> N <sub>3</sub> O <sub>6</sub> S               | 316.1101 |
| Histidine                 | 5.96 | C <sub>6</sub> H <sub>9</sub> N <sub>3</sub> O <sub>2</sub>                   | 154.0622 | <sup>13</sup> C <sub>6</sub> H <sub>9</sub> N <sub>3</sub> O <sub>2</sub>                   | 160.0823 |
| dCMP                      | 5.99 | C <sub>9</sub> H <sub>14</sub> N <sub>3</sub> O <sub>7</sub> P                | 306.0497 |                                                                                             |          |
| Arginine                  | 6.00 | C <sub>6</sub> H <sub>14</sub> N <sub>4</sub> O <sub>2</sub>                  | 173.1044 | <sup>13</sup> C <sub>6</sub> H <sub>14</sub> N <sub>4</sub> O <sub>2</sub>                  | 179.1245 |
| IMP                       | 6.04 | C <sub>10</sub> H <sub>13</sub> N <sub>4</sub> O <sub>8</sub> P               | 347.0398 |                                                                                             |          |
| Aspartate                 | 6.05 | C <sub>4</sub> H <sub>7</sub> NO <sub>4</sub>                                 | 132.0302 | <sup>13</sup> C <sub>4</sub> H <sub>7</sub> NO <sub>4</sub>                                 | 136.0437 |
| erythrose-4-phosphate     | 6.09 | C <sub>4</sub> H <sub>9</sub> O <sub>7</sub> P                                | 199.0013 |                                                                                             |          |
| Ribose-5-phosphate        | 6.13 | C <sub>5</sub> H <sub>11</sub> O <sub>8</sub> P                               | 229.0119 | <sup>13</sup> C <sub>5</sub> H <sub>11</sub> O <sub>8</sub> P                               | 234.0287 |
| Ribulose-5-phosphate      | 6.13 | C <sub>5</sub> H <sub>11</sub> O <sub>8</sub> P                               | 229.0119 | <sup>13</sup> C <sub>5</sub> H <sub>11</sub> O <sub>8</sub> P                               | 234.0287 |
| Lysine                    | 6.18 | C <sub>6</sub> H <sub>14</sub> N <sub>2</sub> O <sub>2</sub>                  | 145.0983 |                                                                                             |          |
| Flavinadenin dinucleotide | 6.29 | C <sub>27</sub> H <sub>33</sub> N <sub>9</sub> O <sub>15</sub> P <sub>2</sub> | 784.1499 |                                                                                             |          |
| CMP                       | 6.35 | C <sub>9</sub> H <sub>14</sub> N <sub>3</sub> O <sub>8</sub> P                | 322.0446 |                                                                                             |          |
| NADH                      | 6.40 | C <sub>21</sub> H <sub>29</sub> N <sub>7</sub> O <sub>14</sub> P <sub>2</sub> | 664.1175 |                                                                                             |          |
| GMP                       | 6.41 | C <sub>10</sub> H <sub>14</sub> N <sub>5</sub> O <sub>8</sub> P               | 362.0507 | <sup>13</sup> C <sub>10</sub> H <sub>14</sub> N <sub>5</sub> O <sub>8</sub> P               | 372.0843 |
| Mannitol-1-phosphate      | 6.55 | C <sub>6</sub> H <sub>15</sub> O <sub>9</sub> P                               | 261.0381 |                                                                                             |          |
| Fructose-6-Phosphate      | 6.52 | C <sub>6</sub> H <sub>13</sub> O <sub>9</sub> P                               | 259.0224 | <sup>13</sup> C <sub>6</sub> H <sub>13</sub> O <sub>9</sub> P                               | 265.0426 |
| Glucose-6-Phosphate       | 6.52 | C <sub>6</sub> H <sub>13</sub> O <sub>9</sub> P                               | 259.0224 | <sup>13</sup> C <sub>6</sub> H <sub>13</sub> O <sub>9</sub> P                               | 265.0426 |
| Glucose-1-Phosphate       | 6.52 | C <sub>6</sub> H <sub>13</sub> O <sub>9</sub> P                               | 259.0224 | <sup>13</sup> C <sub>6</sub> H <sub>13</sub> O <sub>9</sub> P                               | 265.0426 |
| Sedoheptulose-7-phosphate | 6.52 | C <sub>7</sub> H <sub>15</sub> O <sub>10</sub> P                              | 289.033  |                                                                                             |          |
| NAD+                      | 6.68 | C <sub>21</sub> H <sub>27</sub> N <sub>7</sub> O <sub>14</sub> P <sub>2</sub> | 662.1018 | <sup>13</sup> C <sub>21</sub> H <sub>27</sub> N <sub>7</sub> O <sub>14</sub> P <sub>2</sub> | 683.1723 |
| Cystathionine             | 6.72 | C <sub>7</sub> H <sub>14</sub> N <sub>2</sub> O <sub>4</sub> S                | 221.0602 | <sup>13</sup> C <sub>7</sub> H <sub>14</sub> N <sub>2</sub> O <sub>4</sub> S                | 228.0836 |
| Cystine                   | 6.80 | C <sub>6</sub> H <sub>12</sub> N <sub>2</sub> O <sub>4</sub>                  | 239.0166 |                                                                                             |          |
| phosphocreatine           | 6.82 | C <sub>4</sub> H <sub>10</sub> N <sub>3</sub> O <sub>5</sub> P                | 210.0285 |                                                                                             |          |
| Argininosuccinic acid     | 6.89 | C <sub>10</sub> H <sub>18</sub> N <sub>4</sub> O <sub>6</sub>                 | 289.1154 | <sup>13</sup> C <sub>10</sub> H <sub>18</sub> N <sub>4</sub> O <sub>6</sub>                 | 299.1489 |
| ADP                       | 7.13 | C <sub>10</sub> H <sub>15</sub> N <sub>5</sub> O <sub>10</sub> P <sub>2</sub> | 426.0221 | <sup>13</sup> C <sub>10</sub> H <sub>15</sub> N <sub>5</sub> O <sub>10</sub> P <sub>2</sub> | 436.0557 |
| NADPH                     | 7.21 | C <sub>21</sub> H <sub>30</sub> N <sub>7</sub> O <sub>17</sub> P <sub>3</sub> | 744.0838 |                                                                                             |          |
| UDP                       | 7.28 | C <sub>9</sub> H <sub>14</sub> N <sub>2</sub> O <sub>12</sub> P <sub>2</sub>  | 402.9949 |                                                                                             |          |
| NADP+                     | 7.41 | C <sub>21</sub> H <sub>29</sub> N <sub>7</sub> O <sub>17</sub> P <sub>3</sub> | 742.0682 |                                                                                             |          |
| Fructose-1,6-bisphosphate | 7.46 | C <sub>6</sub> H <sub>14</sub> O <sub>12</sub> P                              | 338.9888 | <sup>13</sup> C <sub>6</sub> H <sub>14</sub> O <sub>12</sub> P                              | 345.0089 |
| GDP                       | 7.51 | C <sub>10</sub> H <sub>15</sub> N <sub>5</sub> O <sub>11</sub> P <sub>2</sub> | 442.0171 |                                                                                             |          |
| Citric acid               | 7.53 | C <sub>6</sub> H <sub>8</sub> O <sub>7</sub>                                  | 193.0343 |                                                                                             |          |
| Isocitric acid            | 7.53 | C <sub>6</sub> H <sub>8</sub> O <sub>7</sub>                                  | 193.0343 |                                                                                             |          |
| Glutathione oxidized      | 7.55 | C <sub>20</sub> H <sub>32</sub> N <sub>6</sub> O <sub>12</sub> S <sub>2</sub> | 611.1447 |                                                                                             |          |
| Malate                    | 7.55 | C <sub>4</sub> H <sub>6</sub> O <sub>5</sub>                                  | 133.0142 | <sup>13</sup> C <sub>4</sub> H <sub>6</sub> O <sub>5</sub>                                  | 137.0277 |
| 6-Phosphogluconate        | 7.83 | C <sub>6</sub> H <sub>13</sub> O <sub>10</sub> P                              | 275.0174 |                                                                                             |          |
| 3-Phosphoglycerate        | 7.87 | C <sub>3</sub> H <sub>7</sub> O <sub>7</sub> P                                | 184.9857 |                                                                                             |          |
| ATP                       | 8.13 | C <sub>10</sub> H <sub>16</sub> N <sub>5</sub> O <sub>13</sub> P <sub>3</sub> | 505.9885 | <sup>13</sup> C <sub>10</sub> H <sub>16</sub> N <sub>5</sub> O <sub>13</sub> P <sub>3</sub> | 516.022  |
| dATP                      | 8.21 | C <sub>10</sub> H <sub>17</sub> N <sub>5</sub> O <sub>12</sub> P <sub>3</sub> | 491.0013 |                                                                                             |          |
| dGTP                      | 8.25 | C <sub>10</sub> H <sub>16</sub> N <sub>5</sub> O <sub>13</sub> P <sub>3</sub> | 505.9885 | <sup>13</sup> C <sub>10</sub> H <sub>16</sub> N <sub>5</sub> O <sub>13</sub> P <sub>3</sub> | 516.022  |
| UTP                       | 8.27 | C <sub>9</sub> H <sub>16</sub> N <sub>2</sub> O <sub>15</sub> P <sub>3</sub>  | 483.9691 |                                                                                             |          |
| GTP                       | 8.36 | C <sub>10</sub> H <sub>16</sub> N <sub>5</sub> O <sub>14</sub> P <sub>3</sub> | 521.9834 |                                                                                             |          |
| dCTP                      | 8.66 | C <sub>9</sub> H <sub>17</sub> N <sub>3</sub> O <sub>13</sub> P <sub>3</sub>  | 466.9901 |                                                                                             |          |
| TTP                       | 8.78 | C <sub>10</sub> H <sub>18</sub> N <sub>2</sub> O <sub>14</sub> P <sub>3</sub> | 481.9898 |                                                                                             |          |
| CTP                       | 9.14 | C <sub>9</sub> H <sub>16</sub> N <sub>3</sub> O <sub>14</sub> P <sub>3</sub>  | 481.9772 |                                                                                             |          |

\*Isomers which could be separated on the UPLC BEH Amide column at pH 4 in negative mode. For further identification an analysis of the single standard is necessary.

**Table S7** Isomers present in the 10  $\mu$ M multicomponent standard and measured on the UPLC BEH Amide column at pH 4 in positive and negative mode. The isomers Pseudouridine/Uridine, Gultamate/N-acetyl-serine, Ribose/Xylose, Guanosine/Isoguanosine, could be separated with this method. The rest of the isomers were partially separated and integrated as one single peak with the exception of Homoserine/Threonine, 2-phosphoglycerate/3-phosphoglycerate, Citrate/isocitrate, 3-methylcytidine/4-methylcytidine and ATP/dGTP which could not be separated.

| Isomers                                 | Separation    |
|-----------------------------------------|---------------|
| Hexose phosphates                       | partial       |
| Glutamate/N-Acetyl-serine               | separated     |
| 3AMP/5AMP                               | partial       |
| Hexoses                                 | partial       |
| Ribose-5-phosphate/Ribulose-5-phosphate | partial       |
| Alanine/sarcosine                       | partial       |
| Pseudouridine/Uridine                   | separated     |
| Guanosine/isoguanosine                  | separated     |
| Homoserine/Threonine                    | not separated |
| 2-phosphoglycerate/3-phosphoglycerate   | not separated |
| Citrate/isocitrate                      | not separated |
| 3-methylcytidine/4-methylcytidine       | not separated |
| Ribose/xylose                           | separated     |
| ATP/dGTP                                | not separated |

**Table S8** Repeatability over >25 h of the UPLC BEH Amide column at pH 4 in positive and negative mode regarding a 10  $\mu$ M multicomponent standard (N=3 technical replicates).

| positive      |         | negative      |         |
|---------------|---------|---------------|---------|
| # of metabol. | RSD (%) | # of metabol. | RSD (%) |
| 19            | 0-5     | 98            | 0-5     |
| 39            | 6-15    | 18            | 6-15    |
| 31            | 16-30   | 2             | 16-30   |
| 16            | 31-60   | 0             | 31-60   |
| 1*            | >60     | 0             | >60     |

\*corresponding to UTP.

**Table S9** Full width at half maximum (FWHM) observed with the UPLC BEH Amide column at pH 4 in positive and negative mode regarding a multicomponent standard 10  $\mu$ M.

| positive      |           | negative      |           |
|---------------|-----------|---------------|-----------|
| # of metabol. | FWHM      | # of metabol. | FWHM      |
| 16            | 1.0-3.0   | 18            | 1.0-3.0   |
| 34            | 3.1-5.0   | 34            | 3.1-5.0   |
| 40            | 5.1-10.0  | 44            | 5.1-10.0  |
| 4             | 10.1-20.0 | 3             | 10.1-20.0 |
| 3             | 20.0-40.0 | 7             | 20.0-40.0 |
| 1             | 40.1-60.0 | 3             | 40.1-60.0 |
| 8*            | >60       | 9*            | >60       |

\*corresponding mainly to nucleotides. Their peak width increased with the number of phosphates.

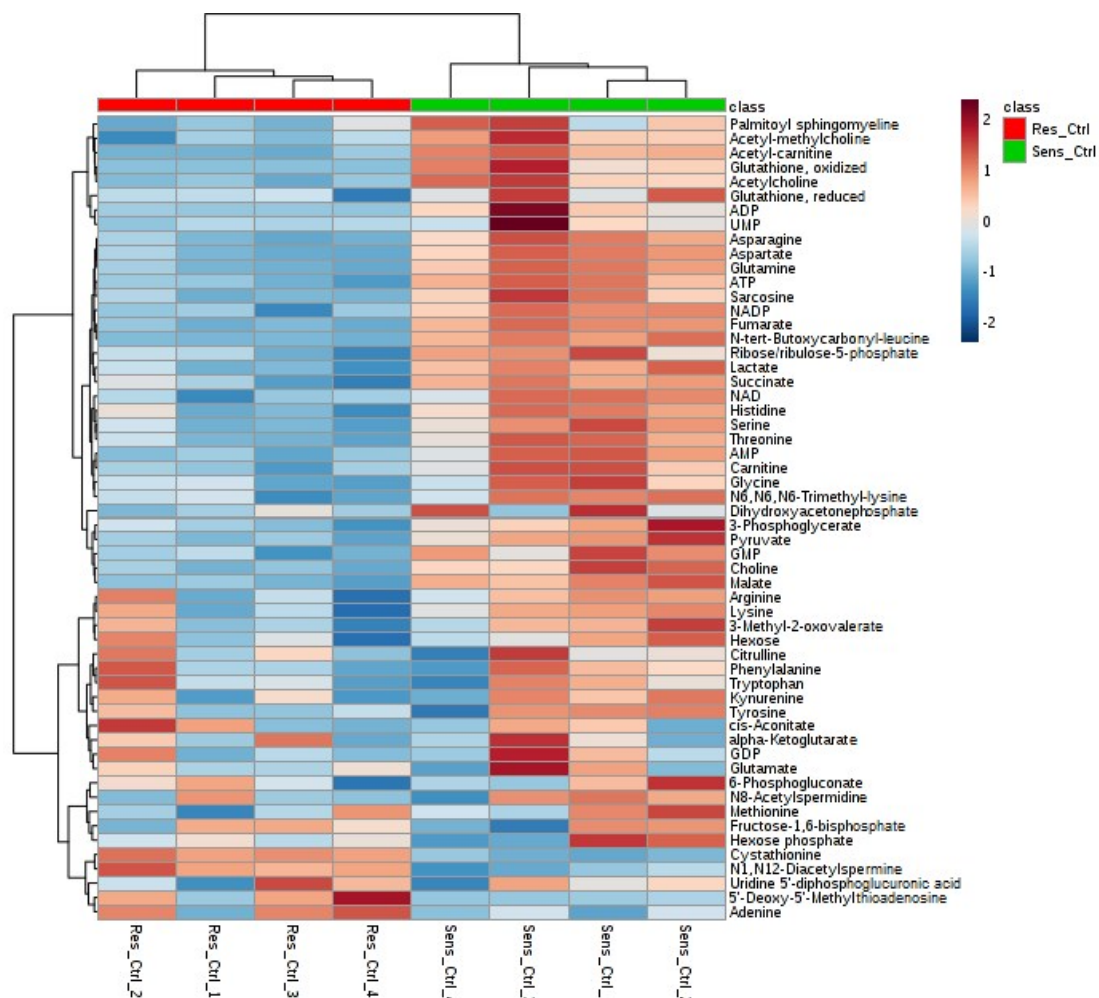

**Figure S6** Heatmap of the different compounds found in sensitive and resistant HCT116 cell control for 24 h. Method: UPLC BEH Amide at pH 4 in positive and negative mode combining targeted (internal standardization) and untargeted metabolomics. Hierarchical clustering separated the two investigated groups. Sensitive HCT116 cells showed overall higher metabolite amounts as compared to the resistant counterpart, with the exception of N1,N12-diacetylspermine, cystathionine, uridine 5'-diphosphoglucuronic acid and 5'-deoxy-5'-methylthioadenosine.

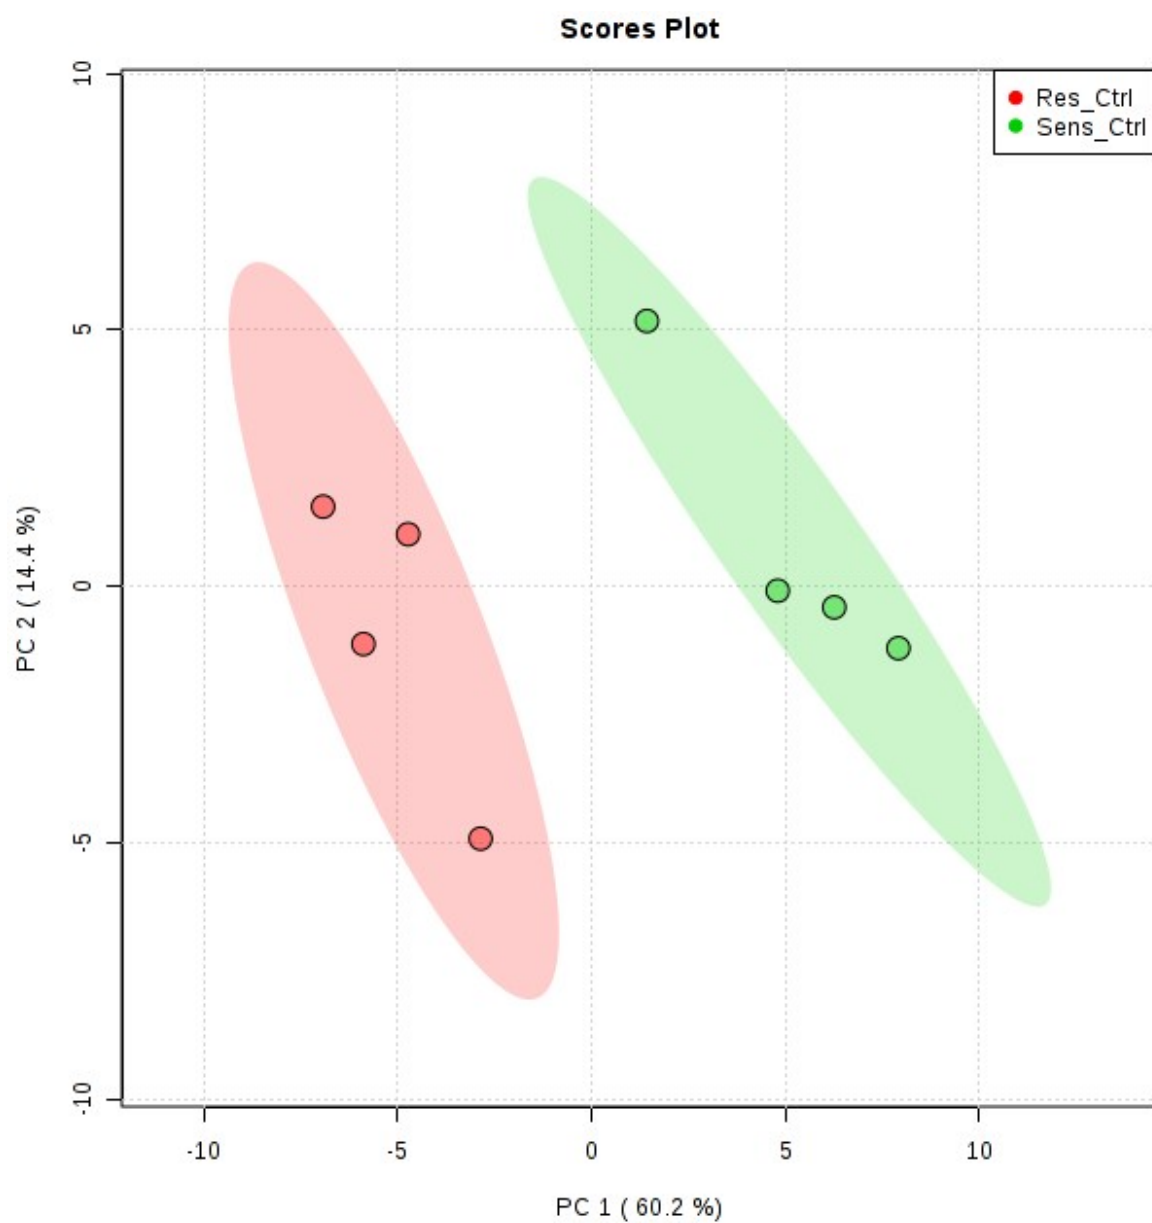

**Figure S7** Principal component analysis of sensitive HCT116 cell control vs resistant HCT116 cell control for 24 h. Method: UPLC BEH Amide at pH 4 in positive and negative mode combining targeted (internal standardization) and untargeted metabolomics. A clear separation could be observed between both groups.

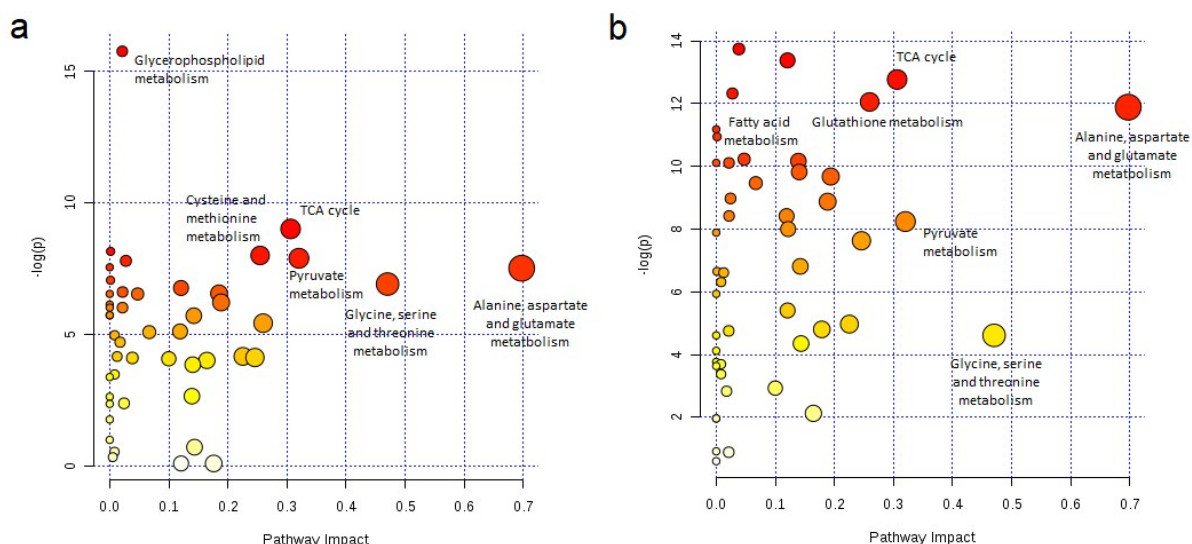

**Figure S8** Main metabotype differences found after 24 h in **(a)** sensitive vs resistant HCT116 cell control and in **(b)** sensitive HCT116 cell control vs sensitive HCT116 cell incubated with oxaliplatin 5  $\mu$ M. Method: UPLC BEH Amide at pH 4 in positive and negative mode combining targeted (internal standardization) and untargeted metabolomics. Source: Metaboanalyst 4.0 (autoscaled, pathway enrichment analysis global test, pathway topology analysis with relative betweenness centrality, pathway library Homo sapiens KEGG).

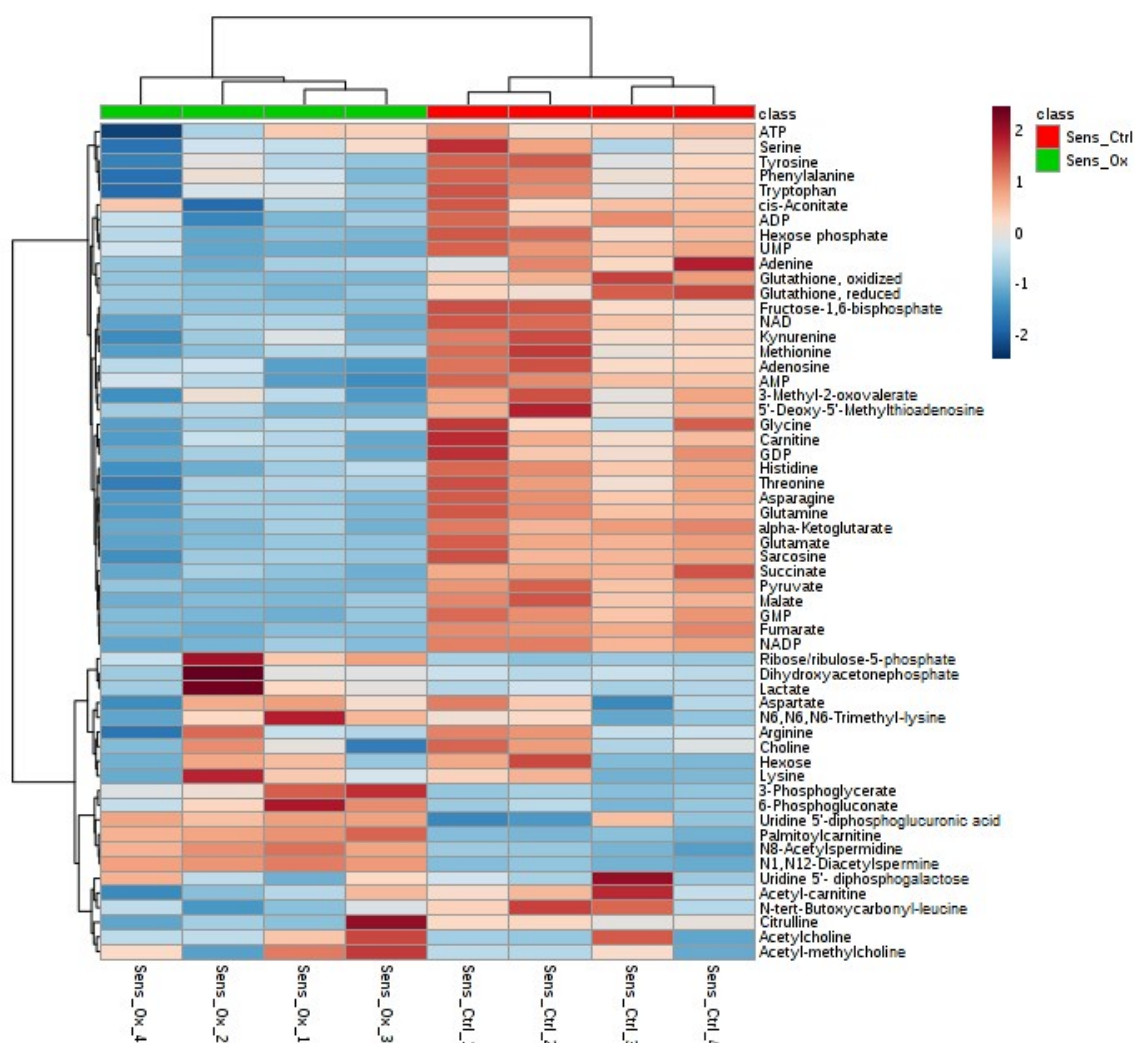

**Figure S9** Heatmap of the different compounds found in sensitive HCT116 cell control and in sensitive HCT116 cell incubated with oxaliplatin 5  $\mu$ M for 24 h. Method: UPLC BEH Amide at pH 4 in positive and negative mode combining targeted (internal standardization) and untargeted metabolomics. A clear separation could be observed between sensitive cells with and without drug (denoted as sensitive control). Overall the metabolite levels were higher in the sensitive line control experiment, with the exception of 3-phosphoglycerate, 6-phosphogluconate, uridine 5'-diphosphoglucuronic acid palmitoylcarnitine, N8-acetylspermine and N1,N12-diacetylspermine.



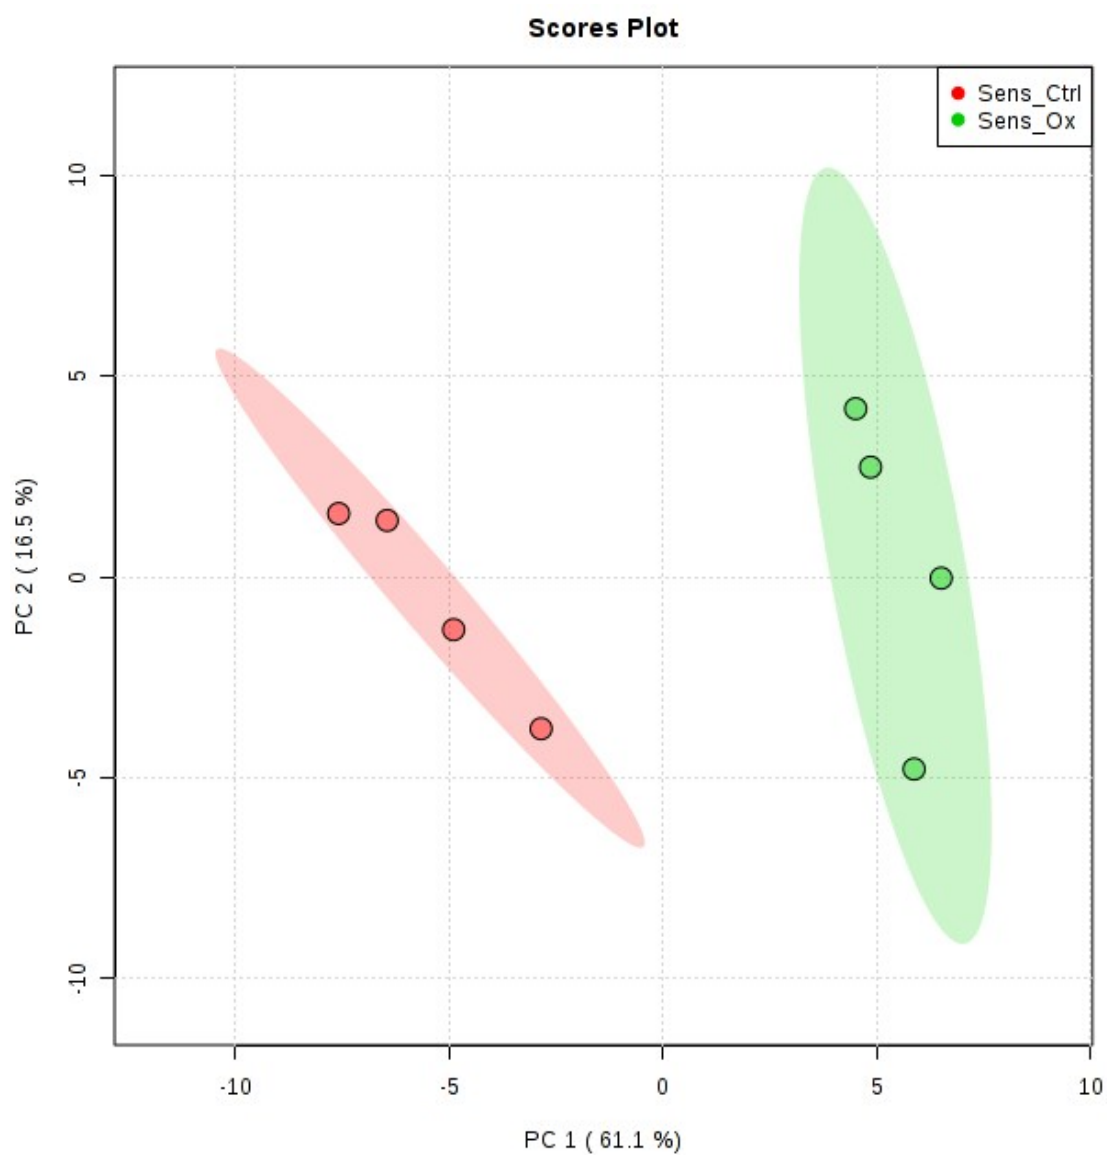

**Figure S10** Principal component analysis of sensitive HCT116 cell control vs sensitive HCT116 incubated with oxaliplatin 5  $\mu$ M for 24 h. Method: UPLC BEH Amide at pH 4 in positive and negative mode combining targeted (internal standardization) and untargeted metabolomics. A clear separation could be observed between both groups.

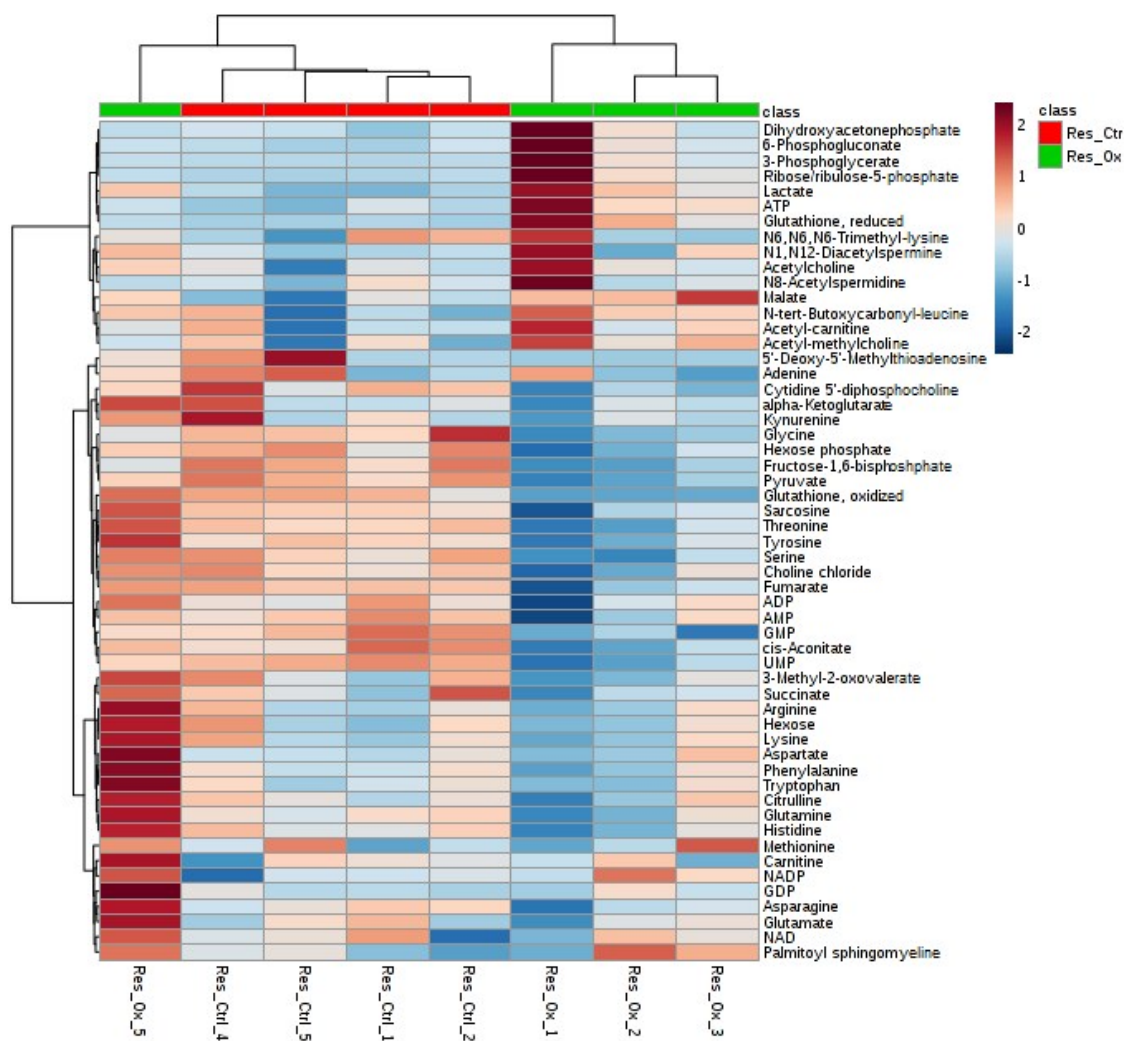

**Figure S11** Heatmap of the different compounds found in resistant HCT116 cell control and in resistant HCT116 cell incubated with oxaliplatin 5  $\mu$ M for 24 h. Method: UPLC BEH Amide at pH 4 in positive and negative mode combining targeted (internal standardization) and untargeted metabolomics. Only subtle changes could be observed.

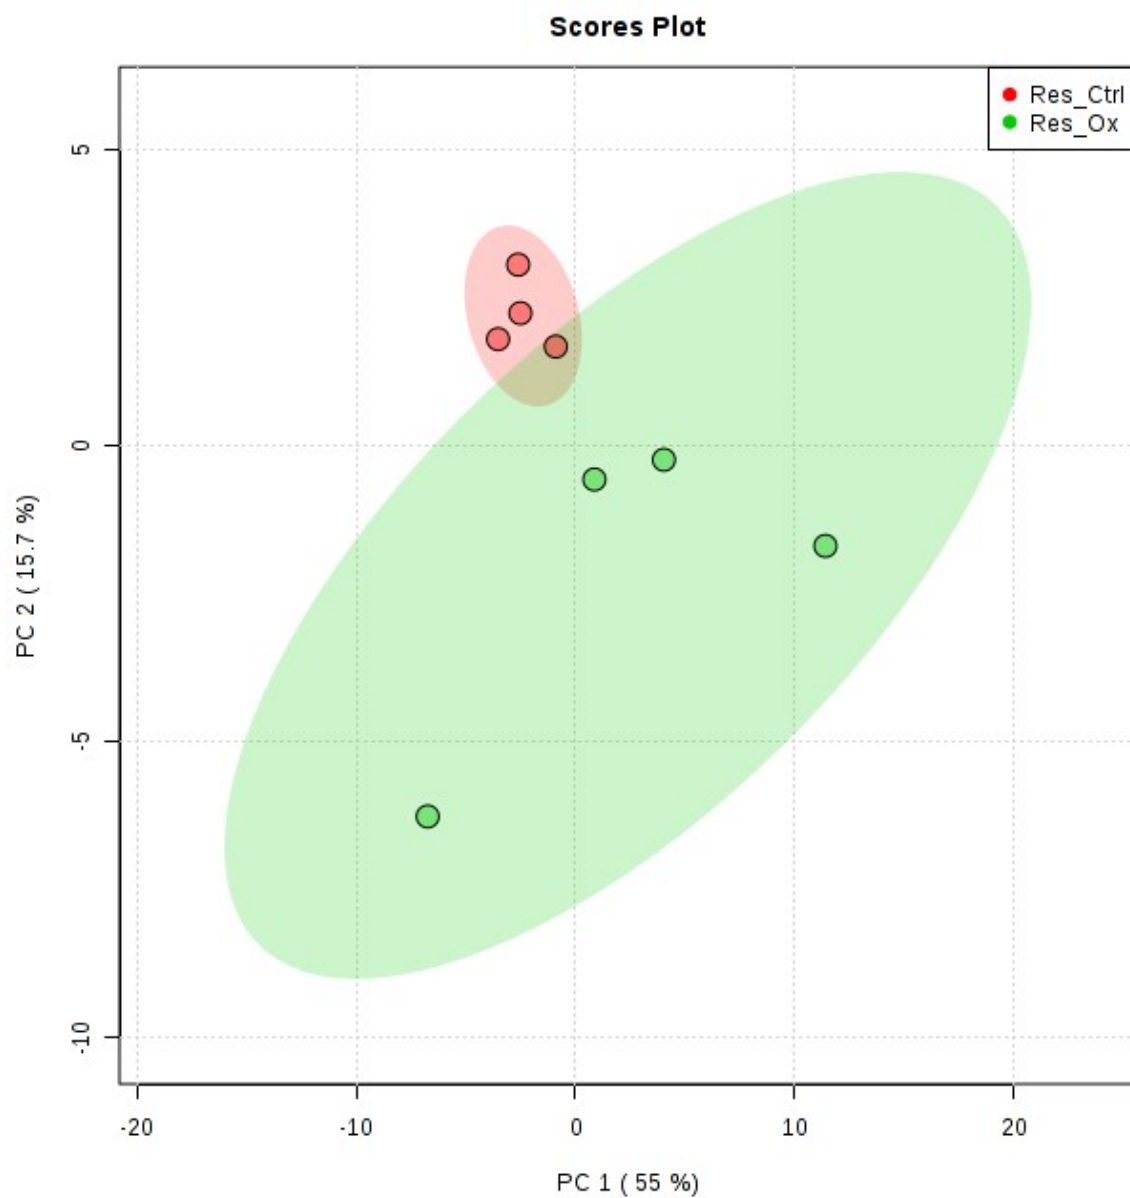

**Figure S12** Principal component analysis of resistant HCT116 cell control vs resistant HCT116 incubated with oxaliplatin 5  $\mu$ M for 24 h. Method: UPLC BEH Amide at pH 4 in positive and negative mode combining targeted (internal standardization) and untargeted metabolomics. The separation between both groups was not pronounced.

**Table S10** Pearson correlation of the different metabolites (and their associated pathways) with the incubation time (4, 8, 24 h) in targeted metabolomics. Samples: sensitive HCT116 cell control and sensitive HCT116 cell incubated with 5  $\mu$ M oxaliplatin. Method: UPLC BEH Amide at pH 4 in positive and negative mode with internal standardization and protein normalization. Differences in Pearson correlation between experiments without (sensitive control) and with drug incubation (sensitive oxaliplatin) were interpreted as metabolic perturbation exerted by the drug. The highest differences in the Pearson correlation are found for dihydroxyacetonephosphate, 2/3-Phosphoglycerate, glutamine, fructose-1,6-bisphosphate, serine, adenine, GMP and pyruvate.

| Metabolite                   | Sens Ctrl | Sens Oxali | Pathway                                                                                                                                                     |
|------------------------------|-----------|------------|-------------------------------------------------------------------------------------------------------------------------------------------------------------|
| NADP+                        | 0.912     | 0.953      | Glutathione metabolism.<br>Nicotinate and nicotinamide metabolism                                                                                           |
| Glutathione, oxidized        | 0.810     | 0.778      | Glutathione metabolism                                                                                                                                      |
| Glutathione, reduced         | -0.457    | -0.921     | Cysteine and methionine metabolism.<br>Glutathione metabolism.                                                                                              |
| Methionine                   | -0.971    | -0.935     | Cysteine and methionine metabolism                                                                                                                          |
| Hexose phosphate             | 0.466     | 0.438      | Glycolysis / Gluconeogenesis. Pentose phosphate pathway                                                                                                     |
| Hexose                       | -0.900    | -0.395     | Glycolysis / Gluconeogenesis.<br>Pentose phosphate pathway                                                                                                  |
| Lactate                      | -0.819    | -0.829     | Glycolysis / Gluconeogenesis                                                                                                                                |
| Dihydroxyacetonephosphate    | 0.554     | -0.502     | Glycolysis / Gluconeogenesis                                                                                                                                |
| 2/3-Phosphoglycerate         | -0.026    | -0.985     | glycolysis and calvin cycle                                                                                                                                 |
| Glutamate                    | 0.957     | 0.971      | Arginine biosynthesis.<br>Alanine, aspartate and glutamate metabolism. Arginine and proline metabolism.<br>D-Glutamine and D-glutamate metabolism.          |
| Glutamine                    | 0.218     | -0.230     | Arginine biosynthesis. Alanine, aspartate and glutamate metabolism.<br>Purine metabolism. Pyrimidine metabolism.<br>D-Glutamine and D-glutamate metabolism. |
| Alanine                      | 0.752     | 0.872      | Alanine, aspartate and glutamate metabolism                                                                                                                 |
| Citrulline                   | 0.926     | 0.344      | Arginine biosynthesis                                                                                                                                       |
| Arginine                     | -0.849    | -0.518     | Arginine and proline metabolism                                                                                                                             |
| Fructose-1,6-bisphosphate    | 0.778     | -0.743     | Phenylalanine, tyrosine and tryptophan biosynthesis                                                                                                         |
| Phenylalanine                | -0.869    | -0.733     | Phenylalanine, tyrosine and tryptophan biosynthesis.<br>Phenylalanine metabolism                                                                            |
| Tyrosine                     | -0.868    | -0.485     | Phenylalanine, tyrosine and tryptophan biosynthesis.<br>Tyrosine metabolism                                                                                 |
| Threonine                    | 0.921     | 0.973      | Glycine, serine and threonine metabolism.<br>Valine, leucine and isoleucine biosynthesis                                                                    |
| Serine                       | -0.019    | -0.440     | Glycine, serine and threonine metabolism.<br>Cysteine and methionine metabolism                                                                             |
| Tryptophan                   | -0.829    | -0.748     | Glycine, serine and threonine metabolism.<br>Tryptophan metabolism                                                                                          |
| NAD+                         | 0.975     | 0.900      | Oxidative phosphorylation                                                                                                                                   |
| Carnitine                    | 0.935     | 0.788      | Lysine degradation<br>ABC transporters                                                                                                                      |
| Choline                      | -0.962    | -0.982     | Glycine, serine and threonine metabolism                                                                                                                    |
| Lysine                       | -0.889    | -0.538     | Lysine biosynthesis                                                                                                                                         |
| Histidine                    | -0.785    | -0.254     | Histidine metabolism                                                                                                                                        |
| Ribose-/ribulose-5-phosphate | -0.916    | -0.968     | Pentose phosphate pathway. Purine metabolism                                                                                                                |
| Glycine                      | 0.966     | 0.948      | Purine and pyrimidine metabolism                                                                                                                            |

|                            |        |        |                                                                                          |
|----------------------------|--------|--------|------------------------------------------------------------------------------------------|
| Adenine                    | 0.677  | -0.971 | Purine and pyrimidine metabolism                                                         |
| GMP                        | 0.243  | -0.998 | Purine and pyrimidine metabolism                                                         |
| GDP                        | 0.922  | 0.999  | Purine and pyrimidine metabolism                                                         |
| ADP                        | 0.989  | 1.000  | Purine and pyrimidine metabolism                                                         |
| AMP                        | 0.845  | 0.982  | Purine and pyrimidine metabolism                                                         |
| ATP                        | 0.996  | 1.000  | Purine and pyrimidine metabolism                                                         |
| alpha-Ketoglutarate        | 0.711  | 1.000  | TCA cycle                                                                                |
| Fumarate                   | 0.864  | 0.790  | TCA cycle                                                                                |
| Malate                     | 0.735  | 0.990  | TCA cycle                                                                                |
| Pyruvate                   | 0.826  | -0.226 | TCA cycle. Glycolysis / Gluconeogenesis.                                                 |
| Succinate                  | -0.558 | -0.998 | TCA cycle. Oxidative phosphorylation                                                     |
| 3-Methyl-2-oxovaleric acid | 0.310  | 0.990  | Valine, leucine and isoleucine biosynthesis/degradation                                  |
| Asparagine                 | 0.711  | 0.896  | Alanine, aspartate and glutamate metabolism                                              |
| Aspartate                  | 0.992  | 0.995  | Alanine, aspartate and glutamate metabolism.<br>Glycine, serine and threonine metabolism |

**Table S11** Pearson correlation of the different metabolites (and their associated pathways) with the incubation time (4, 8, 24h) in untargeted metabolomics. Samples: sensitive HCT116 cell control and sensitive HCT116 cell incubated with 5  $\mu$ M oxaliplatin. Method: UPLC BEH Amide at pH 4 in positive and negative mode with protein normalization. Differences in Pearson correlation between experiments without (sensitive control) and with drug incubation (sensitive oxaliplatin) were interpreted as metabolic perturbation exerted by the drug. A difference was observed in palmitoylcarnitine upon drug incubation.

| Metabolite                        | Sens Ctrl | Sens Oxali | Pathway                                       |
|-----------------------------------|-----------|------------|-----------------------------------------------|
| N-(tert-Butoxycarbonyl)-L-leucine | 0.662     | 0.811      | N/A                                           |
| N1,N12-Diacetylspermine           | 0.692     | 0.675      | N/A                                           |
| N8-Acetylspermidine               | 0.704     | 0.741      | N/A                                           |
| Palmitoylcarnitine                | -0.949    | 0.820      | Fatty acid degradation. Fatty acid metabolism |

**Table S12** Pearson correlation of the different metabolites (and their associated pathways) with the incubation time (4, 8, 24 h) in targeted metabolomics. Samples: resistant HCT116 cell control and resistant HCT116 cell incubated with 5  $\mu$ M oxaliplatin. Method: UPLC BEH Amide at pH 4 in positive and negative mode with internal standardization and protein normalization. Differences in Pearson correlation between experiments without (resistant control) and with drug incubation (resistant oxaliplatin) were interpreted as metabolic perturbation exerted by the drug. Only, small changes of metabolite levels could be observed upon drug incubation even after 24 h. High differences in the Pearson correlation can be observed for glutathione reduced, choline, adenine and 3-Methyl-2-oxovaleric acid.

| Metabolite            | Res Ctrl | Res Oxali | Pathway                                                           |
|-----------------------|----------|-----------|-------------------------------------------------------------------|
| NADP+                 | 0.999    | 0.990     | Glutathione metabolism.<br>Nicotinate and nicotinamide metabolism |
| Glutathione, oxidized | 0.983    | 0.976     | Glutathione metabolism                                            |

|                              |        |        |                                                                                                                                                                |
|------------------------------|--------|--------|----------------------------------------------------------------------------------------------------------------------------------------------------------------|
| Glutathione, reduced         | -0.983 | 0.924  | Cysteine and methionine metabolism.<br>Glutathione metabolism.                                                                                                 |
| Methionine                   | -0.116 | -0.612 | Cysteine and methionine metabolism                                                                                                                             |
| Hexose phosphate             | -0.742 | 0.062  | Glycolysis / Gluconeogenesis                                                                                                                                   |
| Hexose                       | -0.900 | -0.395 | Glycolysis / Gluconeogenesis.<br>Pentose phosphate pathway                                                                                                     |
| Lactate                      | -0.874 | -0.934 | Glycolysis / Gluconeogenesis                                                                                                                                   |
| Dihydroxyacetonephosphate    | 0.614  | -0.057 | Glycolysis / Gluconeogenesis                                                                                                                                   |
| 2/3-Phosphoglycerate         | -0.427 | -0.935 | Glycolysis and calvin cycle                                                                                                                                    |
| Glutamate                    | 0.997  | 0.999  | Arginine biosynthesis.<br>Alanine, aspartate and glutamate metabolism. Arginine<br>and proline metabolism.<br>D-Glutamine and D-glutamate metabolism.          |
| Glutamine                    | -0.107 | -0.142 | Arginine biosynthesis. Alanine, aspartate and<br>glutamate metabolism.<br>Purine metabolism. Pyrimidine metabolism.<br>D-Glutamine and D-glutamate metabolism. |
| Alanine                      | 0.981  | 0.983  | Alanine, aspartate and glutamate metabolism                                                                                                                    |
| Citrulline                   | -0.535 | -0.310 | Arginine biosynthesis                                                                                                                                          |
| Arginine                     | -0.820 | -0.760 | Arginine and proline metabolism                                                                                                                                |
| Fructose-1,6-bisphosphate    | 0.867  | 0.988  | Phenylalanine, tyrosine and tryptophan biosynthesis                                                                                                            |
| Phenylalanine                | -0.497 | -0.320 | Phenylalanine, tyrosine and tryptophan biosynthesis.<br>Phenylalanine metabolism                                                                               |
| Tyrosine                     | 0.031  | -0.228 | Phenylalanine, tyrosine and tryptophan biosynthesis.<br>Tyrosine metabolism                                                                                    |
| Threonine                    | 0.013  | 0.089  | Glycine, serine and threonine metabolism.<br>Valine, leucine and isoleucine biosynthesis                                                                       |
| Serine                       | -0.681 | -0.681 | Glycine, serine and threonine metabolism.<br>Cysteine and methionine metabolism                                                                                |
| Tryptophan                   | -0.544 | -0.368 | Glycine, serine and threonine metabolism.<br>Tryptophan metabolism                                                                                             |
| NAD+                         | 0.996  | 1.000  | Oxidative phosphorylation                                                                                                                                      |
| Carnitine                    | 0.991  | 0.989  | Lysine degradation<br>ABC transporters                                                                                                                         |
| Choline                      | 0.979  | -0.829 | Glycine, serine and threonine metabolism                                                                                                                       |
| Lysine                       | -0.825 | -0.776 | Lysine biosynthesis                                                                                                                                            |
| Histidine                    | -0.433 | -0.287 | Histidine metabolism                                                                                                                                           |
| Ribose-/ribulose-5-phosphate | -0.544 | -0.754 | Pentose phosphate pathway. Purine metabolism                                                                                                                   |
| Glycine                      | 0.989  | 1.000  | Purine and pyrimidine metabolism                                                                                                                               |
| Adenine                      | -0.629 | 0.450  | Purine and pyrimidine metabolism                                                                                                                               |
| GMP                          | 0.803  | 0.628  | Purine and pyrimidine metabolism                                                                                                                               |
| GDP                          | 1.000  | 0.993  | Purine and pyrimidine metabolism                                                                                                                               |
| ADP                          | 1.000  | 1.000  | Purine and pyrimidine metabolism                                                                                                                               |
| AMP                          | 0.985  | 0.966  | Purine and pyrimidine metabolism                                                                                                                               |
| ATP                          | 0.997  | 0.984  | Purine and pyrimidine metabolism                                                                                                                               |
| alpha-Ketoglutarate          | 0.999  | 0.945  | TCA cycle                                                                                                                                                      |
| Fumarate                     | 0.999  | 0.993  | TCA cycle                                                                                                                                                      |
| Malate                       | 0.997  | 0.997  | TCA cycle                                                                                                                                                      |
| Pyruvate                     | -0.041 | 0.934  | TCA cycle. Glycolysis / Gluconeogenesis.                                                                                                                       |
| Succinate                    | -0.748 | -0.949 | TCA cycle. Oxidative phosphorylation                                                                                                                           |
| 3-Methyl-2-oxovaleric acid   | -0.654 | 0.777  | Valine, leucine and isoleucine<br>biosynthesis/degradation                                                                                                     |
| Asparagine                   | 0.726  | 0.615  | Alanine, aspartate and glutamate metabolism                                                                                                                    |

Aspartate

0.548

0.883

Alanine, aspartate and glutamate metabolism.  
Glycine, serine and threonine metabolism

**Table S13** Pearson correlation of the different metabolites (and their associated pathways) with the incubation time (4, 8, 24 h) in untargeted metabolomics. Samples: resistant HCT116 cell control and resistant HCT116 cell incubated with 5  $\mu$ M oxaliplatin. Method: UPLC BEH Amide at pH 4 in positive and negative mode with protein normalization. No changes could be observed upon drug incubation.

| Metabolite                        | Res Ctrl | Res Oxali | Pathway                                       |
|-----------------------------------|----------|-----------|-----------------------------------------------|
| N-(tert-Butoxycarbonyl)-L-leucine | 0.969    | 0.990     | N/A                                           |
| N1,N12-Diacetylspermine           | -0.999   | -0.690    | N/A                                           |
| N8-Acetylspermidine               | 0.208    | 0.665     | N/A                                           |
| Palmitoylcarnitine                | -0.996   | -0.920    | Fatty acid degradation. Fatty acid metabolism |
